# Supplementary material
Source: PubMed Central journal article supplement (PMC2848987)
Supplement: NIHMS184046-supplement-1_si_001.pdf [file NIHMS184046-supplement-1_si_001.pdf]

## Supporting Information

### Bioorthogonal Chemical Reporters for Monitoring Protein Acetylation

Yu-Ying Yang<sup>†</sup>, Janice M. Ascano<sup>‡</sup> and Howard C. Hang<sup>†</sup>

<sup>†</sup>Laboratory of Chemical Biology and Microbial Pathogenesis

<sup>‡</sup>Laboratory of Biochemistry and Molecular Biology,  
The Rockefeller University, New York, NY 10065, USA.

E-mail: hhang@mail.rockefeller.edu

### List of Contents

|                                                                                                                                                                                                  |     |
|--------------------------------------------------------------------------------------------------------------------------------------------------------------------------------------------------|-----|
| <b>General Methods and Materials</b> .....                                                                                                                                                       | S3  |
| <b>Scheme S1.</b> Chemical synthesis of alkynyl-acetyl-CoA analogs.....                                                                                                                          | S4  |
| <b>Scheme S2.</b> Chemical synthesis of building block <b>8</b> .....                                                                                                                            | S7  |
| <b>Scheme S3.</b> Chemical synthesis of K <sup>14</sup> -HR-H3 peptide via CuAAC.....                                                                                                            | S7  |
| <b>Scheme S4.</b> Chemical synthesis of azido-diazo-biotin.....                                                                                                                                  | S11 |
| <b>Figure S1.</b> Characterization of p300-catalyzed <i>in vitro</i> acylation on histone H3 peptide and histone H3.....                                                                         | S15 |
| <b>Table S1.</b> List of peptide spectral counts acquired from in-gel trypsin digestion of <i>in vitro</i> acetylated and acylated histone H3.....                                               | S21 |
| <b>Figure S2.</b> Standard curve for quantification of in-gel fluorescence intensity and determination of the kinetic parameters for 4-pentynoyl-CoA in p300-catalyzed histone H3 acylation..... | S22 |
| <b>Figure S3.</b> <sup>1</sup> H NMR spectra of sodium 3-butyrate ( <b>4</b> ), sodium 4-pentynoate ( <b>5</b> ) and sodium 5-hexynoate ( <b>6</b> ).....                                        | S23 |
| <b>Figure S4.</b> Time- and dose-dependent metabolic labeling of mammalian cells with sodium 3-butyrate ( <b>4</b> ), sodium 4-pentynoate ( <b>5</b> ) or sodium 5-hexynoate ( <b>6</b> ).....   | S24 |
| <b>Figure S5.</b> Specificity of sodium 3-butyrate ( <b>4</b> ), sodium 4-pentynoate ( <b>5</b> ) and sodium 5-hexynoate ( <b>6</b> ) metabolic labeling in mammalian cells.....                 | S26 |
| <b>Figure S6.</b> In-gel fluorescence detection of acetylated proteins in different mammalian cell lines using alkynyl-acetate analogs.....                                                      | S30 |

|                                                                                                                                                                                                                                     |     |
|-------------------------------------------------------------------------------------------------------------------------------------------------------------------------------------------------------------------------------------|-----|
| <b>Figure S7.</b> Proteomic analysis of sodium 3-butynoate ( <b>4</b> -), sodium 4-pentynoate ( <b>5</b> -) and sodium 5-hexynoate ( <b>6</b> )-metabolically labeled proteins in Jurkat T cells.....                               | S31 |
| <b>Table S2.</b> Spectral count data of 3-butynoate ( <b>4</b> -), 4-pentynoate ( <b>5</b> -) and 5-hexynoate ( <b>6</b> )-metabolically labeled proteins derived from two independent proteomics experiments (Jurkat T cells)..... | S34 |
| <b>Figure S8.</b> Proteomic analysis of sodium 4-pentynoate ( <b>5</b> )-metabolically labeled proteins (Jurkat T cells).....                                                                                                       | S40 |
| <b>Table S3.</b> Spectral count data of 4-pentynoate ( <b>5</b> )-metabolically labeled proteins (Jurkat T cells).....                                                                                                              | S41 |
| <b>Figure S9.</b> Mapping the modification sites of 4-pentynoate ( <b>5</b> )-labeled proteins in Jurkat T cells.....                                                                                                               | S51 |
| <b>Supplementary References</b> .....                                                                                                                                                                                               | S55 |

### **General Methods and Materials:**

Unless otherwise noted, all the chemical reagents were purchased from either Sigma-Aldrich or Fisher Scientific.  $^1\text{H}$  and  $^{13}\text{C}$  NMR spectra were recorded on Bruker DPX-400 or Bruker AVANCE-600 instrument. Chemical shifts are reported in  $\delta$  ppm, and  $J$  values are reported in Hz. MALDI-TOF mass spectra were acquired on Applied Biosystems Voyager-DE mass spectrometer. HPLC was conducted on Agilent 1100 series HPLC system with HPLC-grade acetonitrile ( $\text{CH}_3\text{CN}$ ) and ultrapure water from Milli-Q Advantage A10 Purification System. In-gel fluorescence scanning was performed using Amersham Biosciences Typhoon 9400 variable mode imager (excitation 532 nm, 580 nm filter, 30 nm band-pass). All contrast/brightness adjustments on the images were applied to the whole gels and blots. All the image adjustments were performed in Photoshop.

HPLC-purified histone H3 peptide (aa 1-20 (L20Y): ARTKQTARKSTGGKAPRKQY, >90% purity based on HPLC analysis) and crude  $\text{K}^{14}$ -5-hexynoyl-histone H3 peptide (aa 1-20, >80% purity based on HPLC analysis) were purchased from the Proteomics Resource Center at the Rockefeller University. az-Rho, alk-12 and alk-16 were generously provided by Guillaume Charron and Paul Dossa in our lab (the synthetic methods for these compounds can be found in the supplementary reference 5). Recombinant histone H3 (human or *Xenopus laevis*) was purchased from Millipore. RPMI media 1640 and Dulbecco's modified Eagle media (DMEM) were purchased from Gibco. EDTA-free protease inhibitor was purchased from Roche Applied Science. Pre-stained protein ladder was purchased from Invitrogen. Pre-cast polyacrylamide gels (4-20% or 15% Criterion Tris-HCl gels) were purchased from Bio-Rad Laboratories. anti-histone H3 (C-16), anti-Hsp90 (F-8), anti- $\alpha$  Enolase (L-27), anti-Cofilin (FL-166), anti-moesin (E-10), anti-HMG-1 (W-18), anti-ADA (D-4) and anti-Cor1A (14.1) were purchased from Santa Cruz Biotechnology. anti-L-plastin was purchased from United States Biological. anti-Ku70 was purchased from Millipore. anti-acetylated lysine was purchased from Cell Signaling Technology. Secondary antibodies were purchased from Jackson ImmunoResearch Laboratories. Mass spectrometry grade trypsin was purchased from Promega. High-capacity streptavidin beads were purchased from Thermo Scientific.

## Synthesis of alkynyl-acetyl-CoA analogs

### Scheme S1. Chemical synthesis of alkynyl-acetyl-CoA analogs.

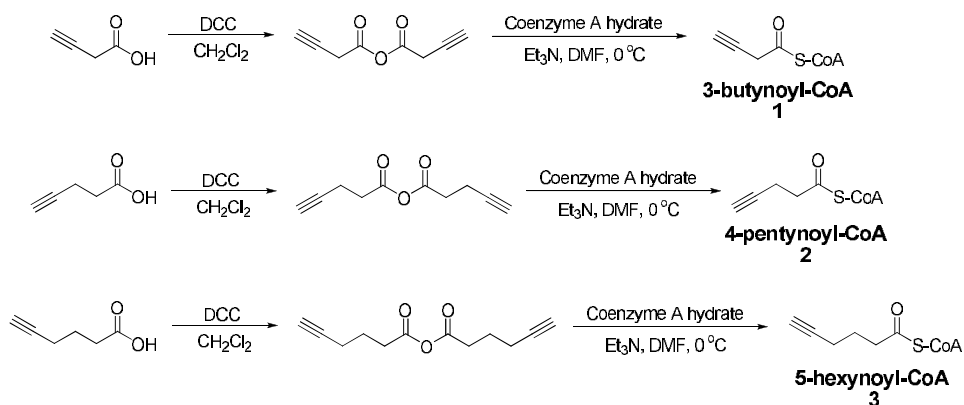

2 mmol of 3-butynoic acid (synthesized from Jones oxidation of 3-butyn-1-ol<sup>1</sup>), 4-pentynoic acid (Fluka), or 5-hexynoic acid (Aldrich) was dissolved in 10 mL of anhydrous dichloromethane. To this solution was added 1 mmol of *N,N'*-dicyclohexylcarbodiimide (DCC) under argon, and the reaction was allowed to proceed at room temperature for 4 h. The anhydride products can be observed on TLC plate by using ethyl acetate/hexane (1/1) as the developing solvent system. The reaction mixture was then concentrated down to dryness, redissolved in anhydrous dimethylformamide (DMF) under argon and cooled to  $4^\circ\text{C}$  in ice-bath. To this reaction mixture was added 0.2 equivalent of coenzyme A hydrate (Sigma, Cat. No: C4282) and 0.6 equivalent of triethylamine ( $\text{Et}_3\text{N}$ ). The reaction was kept in ice bath and stirred for 30 min. Upon completion (as determined by LC/MS), the reaction was neutralized to pH 7 by dropwise addition of 0.1 N aqueous hydrochloride and then concentrated to dryness under high vacuum. The dried crude material was then redissolved in  $\text{H}_2\text{O}/\text{CH}_3\text{CN}$  (1/1) and filtered through the syringe filter devise (Millipore, Cat. No. SLCR013NL,  $0.45\ \mu\text{m}$ , hydrophilic PTFE, 13 mm). The filtrate was subjected to HPLC purification with the elution method set as 95% solution A/5% solution B to 50% solution A/50% solution B over 30 min (solution A:  $\text{H}_2\text{O} + 0.1\% \text{TFA}$ ; solution B:  $\text{CH}_3\text{CN} + 0.1\% \text{TFA}$ ). The alkynyl-acetyl-CoA analogs (**1**, **2** and **3**) were eluted at  $\sim 21$  min under this elution condition.

### Characterization of alkynyl-acetyl-CoA analogs

**3-butynoyl-CoA (1):**  $^1\text{H}$  NMR ( $\text{D}_2\text{O}$ , 600 MHz)  $\delta$  8.58 (s, 1H), 8.32 (s, 1H), 6.11 (m, 1H), 5.35 (d, 1H,  $J = 6.2$  Hz), 4.49 (s, 1H), 4.14 (m, 2H), 3.93 (m, 1H), 3.75 (m, 1H), 3.48 (m, 1H), 3.32-3.45 (m, 5H), 3.23 (m, 2H), 2.92 (m, 1H), 2.28 (m, 2H), 2.15 (m, 1H), 1.11 (m, 4H), 0.83 (s, 3H), 0.70 (s, 3H);  $^{31}\text{P}$  NMR ( $\text{D}_2\text{O}$ , 161.9 MHz)  $\delta$  0.95, -9.65, -10.21; HMRS (ESI-TOF) calcd for  $\text{C}_{25}\text{H}_{35}\text{N}_7\text{NaO}_{17}\text{P}_3\text{S}$  ( $[\text{M}-3\text{H}+\text{Na}]^+$ ) 853.0926, found 853.1426.

**4-pentynoyl-CoA (2):**  $^1\text{H}$  NMR ( $\text{D}_2\text{O}$ , 600 MHz)  $\delta$  8.72 (s, 1H), 8.66 (s, 1H), 8.48 (s, 1H), 6.35 (d, 1H,  $J = 5.3$  Hz), 6.26 (d, 1H,  $J = 5.9$  Hz), 5.21 (m, 2H), 4.72 (m, 1H), 4.64 (brs, 1H), 4.46 (brs, 1H), 4.92 (m, 2H), 4.29 (m, 2H), 4.06 (m, 1H), 3.89 (m, 1H), 3.63 (m, 1H), 3.49 (t, 2H,  $J = 6.5$  Hz), 3.38 (m, 2H), 3.07 (m, 2H), 2.87 (m, 2H), 2.54 (m, 2H), 2.47 (t, 2H,  $J = 6.5$  Hz), 2.38 (m, 1H), 0.97 (s, 3H), 0.84 (s, 3H);  $^{31}\text{P}$  NMR ( $\text{D}_2\text{O}$ , 161.9 MHz)  $\delta$  0.93, -9.61, -10.15; HMRS (ESI-TOF) calcd for  $\text{C}_{26}\text{H}_{41}\text{N}_7\text{O}_{17}\text{P}_3\text{S}$  ( $[\text{M}+\text{H}]^+$ ) 848.1492, found 848.1428.

**5-hexynoyl-CoA (3):**  $^1\text{H}$  NMR ( $\text{D}_2\text{O}$ , 600 MHz)  $\delta$  8.71 (s, 1H), 8.48 (s, 1H), 6.26 (d, 1H,  $J = 5.3$  Hz), 4.91 (m, 2H), 4.63 (s, 1H), 4.30 (m, 2H), 4.06 (brs, 1H), 3.89 (m, 1H), 3.64 (m, 1H), 3.49 (t, 2H,  $J = 6.6$  Hz), 3.37 (t, 2H,  $J = 6.3$  Hz), 3.04 (t, 2H,  $J = 6.3$  Hz), 2.77 (t, 2H,  $J = 7.3$  Hz), 2.47 (t, 2H,  $J = 6.6$  Hz), 2.38 (t, 1H,  $J = 2.4$  Hz), 2.26 (td, 2H,  $J = 7.0, 2.8$  Hz), 1.84 (m, 2H), 0.97 (s, 3H), 0.85 (s, 3H);  $^{31}\text{P}$  NMR ( $\text{D}_2\text{O}$ , 161.9 MHz)  $\delta$  0.95, -9.76, -10.18; HMRS (ESI-TOF) calcd for  $\text{C}_{27}\text{H}_{43}\text{N}_7\text{O}_{17}\text{P}_3\text{S}$  ( $[\text{M}+\text{H}]^+$ ) 862.1649, found 862.1572.

### Preparation of recombinant p300

Flag-tagged human p300 was prepared as previously described by baculoviral infection of SF9 cells<sup>2</sup>. Cells were lysed in lysis buffer (20 mM Tris, pH 7.5, 500 mM NaCl, 4 mM  $\text{MgCl}_2$ , 0.4 mM EDTA, 20% glycerol, 2 mM DTT, and supplemented with protease inhibitors). Clarified cell lysates were diluted to 300 mM NaCl, and NP-40 was added to 0.1% final concentration. Flag M2 agarose resin (Sigma) was added to the lysate and incubated for 4 hours at 4 °C. Resin was washed extensively with BC buffer (20 mM Tris, pH 7.9, 20% glycerol) containing 300 mM KCl, and p300 protein was eluted by 0.5 mg/ml Flag peptide in BC buffer containing 100 mM KCl. Protein concentration and purity were estimated by comparison to BSA standards on SDS gels stained with Gelcode Blue stain (Pierce).

### MALDI-TOF analysis of p300-catalyzed acylation of histone H3 peptide *in vitro*

*In vitro* acylation reactions were carried out based on the reported procedure<sup>3</sup> with some modifications. 10  $\mu\text{L}$  reaction solution containing 25 pmol H3 peptide, 20  $\mu\text{M}$  acetyl-CoA or alkynyl-acetyl-CoA analogs, 50 ng of p300, 50 mM, pH 7.9 Tris buffer and 10% glycerol was incubated for 2 h at 30 °C. The peptide products were then extracted with ZipTip (Millipore) and eluted with 1.5  $\mu\text{L}$  of 50%  $\text{CH}_3\text{CN}$  (with 0.1% TFA). Eluent (1  $\mu\text{L}$ ) mixed with the ionization matrix (1  $\mu\text{L}$ ),  $\alpha$ -cyano-4-hydroxycinnamic acid, was spotted onto MALDI plates and subjected to MS analysis. The experimental results were shown in **Figure S1a**.

### Stability of alkynyl-acetyl-CoA analogs

The stability of alkynyl-acetyl-CoA analogs were examined by incubating alkynyl-acetyl-CoA analogs (in 50 mM Tris buffer, pH 7.9) with or without 1 mM dithiothreitol at 30 °C as previously described<sup>4</sup>. The results were analyzed by analytical HPLC (100% solution A to 30% solution A/70% solution B over 30 min, solution A:  $\text{H}_2\text{O}$  + 0.1% TFA; solution B:  $\text{CH}_3\text{CN}$  + 0.1% TFA). As a comparison, we also examined the stability of acetyl-CoA under the same condition. CoA, acetyl-CoA and alkynyl-acetyl-CoA analogs can all be detected by UV at 210 nm. The half-life time for acetyl-CoA is  $\gg$  4 h (Tris buffer only) and 3 h (with DTT). 3-butynoyl-CoA was found to be quite unstable. The half-life time for 3-butynoyl-CoA is 30 min (Tris buffer only) and  $<10$  min (with DTT). The half-life time for 4-pentynoyl-CoA is  $\gg$  4 h (Tris buffer only) and 1.5 h (with DTT). The half-life time for 5-hexynoyl-CoA is  $\gg$  4 h (Tris buffer only) and 3 h (with DTT). HPLC chromatographs are shown in **Figure S1b**.

### *In vitro* acylation of histone H3 protein by p300 and mapping protein modification sites

15  $\mu\text{L}$  reaction solution containing histone H3 (0.3-1.7  $\mu\text{g}$ ), 160  $\mu\text{M}$  acetyl-CoA or alkynyl acetyl-CoA analogs, 100 ng p300, 50 mM, pH 7.9 Tris buffer and 10% glycerol was incubated for 2 h at 30 °C. Following the *in vitro* reaction, proteins were separated on 15% SDS-PAGE and stained with coomassie brilliant blue R-250 staining solution (Bio-Rad). The gel slices containing histone H3 products were excised from each lane, washed with 50 mM ammonium bicarbonate (ABC) twice, destained with 50 mM ABC/ $\text{CH}_3\text{CN}$  (50/50) twice and dehydrated

with CH<sub>3</sub>CN. After drying the gel slices in SpeedVac, gel slices were rehydrated with trypsin solution (2 µg of trypsin for each vial/gel slice) and incubated in 37 °C water bath for 18 h. Trypsin-digested peptides in solution were collected, dried in SpeedVac, resuspended in H<sub>2</sub>O (with 0.1% TFA) and submitted samples to nano-HPLC/MS/MS analysis (Thermo LTQ-Orbitrap in the Proteomic Resource Center at Rockefeller University).

LC-MS analysis was performed with a Dionex 3000 nano-HPLC coupled to an LTQ-Orbitrap ion trap mass spectrometer (ThermoFisher). Peptides were pressure loaded onto a home-made 75 µm diameter, 15 cm C<sub>18</sub> reverse phase column and separated with a gradient running from 95% buffer A (HPLC water with 0.1% formic acid) and 5% buffer B (HPLC grade acetonitrile with 0.1% formic acid) to 55% B over 30 min, next ramping to 95% B over 10 min and holding 95% B for 10 min. One full MS scan (300-2000 MW) was followed by 3 data dependent scans of the *n*th most intense ions with dynamic exclusion enabled. The spray voltage was set to 1.94 kV and the flow rate through the column was set to 0.25 µL/min.

Raw tandem mass spectra were searched against the human IPI protein database version 3.56 using SEQUEST search engine (Thermo Scientific). Cysteine carbamido-methylation was searched as fixed modification, while methionine/tryptophan oxidation, asparagines/glutamine deamidation, lysine/serine/threonine/cysteine acetylation/3-butynoylation/4-pentynoylation/5-hexynoylation, N-terminal acetylation/3-butynoylation /4-pentynoylation/5-hexynoylation were searched as variable modifications. Peptide tolerance was set as 10.0 ppm, fragment ion tolerance was set as 1.0 AMU and trypsin was set as the digestion enzyme. The resulting searching files were then analyzed and visualized by Scaffold 2 proteome software. Each identified protein must contain at least 2 unique peptides that are exclusively assigned to this protein with a minimum protein identification probability of 99%. Each peptide spectrum must meet several selection thresholds including >95% for peptide identification probability, >1.0 for SEQUEST XCorr score, and ±6 ppm for actual minus calculated peptide mass. The experimental results were shown in **Figure S1c-d**, and **Table S1**.

### **In-gel fluorescence detection of p300-catalyzed *in vitro* acylation**

Following 2 h incubation at 30 °C, 15 µL *in vitro* acylation reaction was stopped by adding 10 µL of 4% SDS buffer (4% SDS, 150 mM NaCl, 50 mM triethanolamine, pH 7.4). CuAAC reaction was subsequently carried out by adding 2 µL of freshly-premixed “click chemistry cocktail”<sup>5</sup> (100 µM az-Rho<sup>5</sup>, 1 mM TCEP, 100 µM (Tris[(1-benzyl-1H-1, 2, 3-triazole-4-yl)methyl] amine (TBTA)<sup>6</sup> and 1 mM CuSO<sub>4</sub>) to the acylation reaction. CuAAC reactions were allowed to proceed at room temperature for 1 h, and proteins were subsequently separated on 15% SDS-PAGE. The gel was soaked in destaining solution (40% MeOH, 10% AcOH, 50% H<sub>2</sub>O) for 1-2 h to remove the non-covalently bound az-Rho dye. After washing with dd H<sub>2</sub>O, the gel was subjected to in-gel fluorescence scanning. The experimental results were shown in **Figure 1b** and **Figure S1e-f**.

**Chemical synthesis of the building block (8) for K<sup>14</sup>-(5-hexynoyl)-H3 peptide (1-20).**  
**Scheme S2. Chemical synthesis of building block 8**

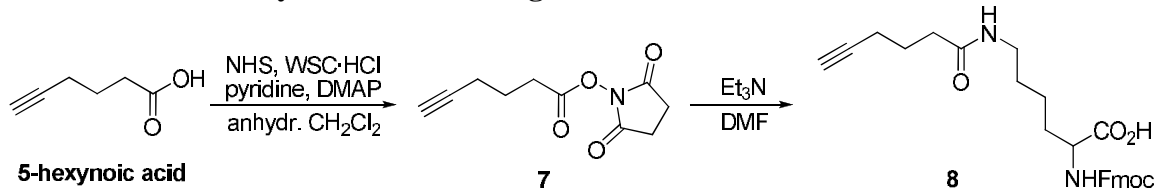

To the solution containing 5-hexynoic acid (9.1 mmol) in anhydrous CH<sub>2</sub>Cl<sub>2</sub> (15 mL) was subsequently added N-hydroxysuccinimide (18.1 mmol), WSC·HCl (9.1 mmol), pyridine (10.9 mmol) and 4-dimethylamino-pyridine (1.1 mmol). The reaction was allowed to proceed at room temperature for overnight. The crude product was washed and extracted with CH<sub>2</sub>Cl<sub>2</sub> and H<sub>2</sub>O thrice. The combined organic layers were dried under vacuo and the crude product was separated by silica gel chromatography (ethyl acetate/hexane = 1/3). The yield of the pure compound **7** is 73%. <sup>1</sup>H NMR (CDCl<sub>3</sub>, 600 MHz) δ 2.92 (brs, 4H), 2.75 (t, 2H, *J* = 11.1 Hz), 2.33 (td, 2H, *J* = 10.3, 3.8 Hz), 1.99 (t, 1H, *J* = 3.8 Hz), 1.95 (t, 2H, *J* = 10.7 Hz); <sup>13</sup>C NMR (CDCl<sub>3</sub>, 150 MHz) δ 169.5, 168.6, 83.7, 70.2, 30.1, 26.0, 23.8, 18.0; HMRS (ESI-TOF) calcd for C<sub>10</sub>H<sub>12</sub>NO<sub>2</sub> ([M+H]<sup>+</sup>) 210.0766, found 210.1063.

Compound **7** (1.8 mmol) was dissolved in 5 mL anhydrous DMF. To this solution was added commercial available Fmoc-lysine-OH·HCl (1.5 mmol) and triethylamine (1.8 mmol). The mixture was stirred at room temperature for 3 h. Upon the reaction was complete, remove all the solvents under vacuo. The dried residue was subjected to flash column chromatography (MeOH/CH<sub>2</sub>Cl<sub>2</sub> = 1/9) and yield the pure compound **8** in 54% yield. <sup>1</sup>H NMR (d<sup>4</sup>-MeOH, 600 MHz) δ 7.78 (d, 2H, *J* = 7.6 Hz), 7.66 (dd, 2H, *J* = 7.8, 7.8 Hz), 7.38 (dd, 2H, *J* = 7.5, 7.5 Hz), 7.30 (dd, 2H, *J* = 7.4, 7.4 Hz), 4.30-4.39 (m, 2H), 4.20 (t, 1H, *J* = 6.9 Hz), 4.12 (dd, 1H, *J* = 8.2, 4.7 Hz), 3.18 (t, 2H, *J* = 6.8 Hz) 2.18-2.39 (m, 6H), 1.76-1.81 (m, 3H), 1.49-1.55 (m, 2H), 1.38-1.45 (m, 2H); <sup>13</sup>C NMR (d<sup>4</sup>-MeOH, 150 MHz) δ 179.1, 176.1, 159.4, 146.2, 146.0, 129.6, 129.0, 127.1, 121.7, 85.0, 71.1, 68.7, 57.0, 49.2, 40.9, 36.7, 33.6, 30.8, 26.8, 25.0, 19.5; HMRS (ESI-TOF) calcd for C<sub>27</sub>H<sub>31</sub>N<sub>2</sub>O<sub>5</sub> ([M+H]<sup>+</sup>) 463.2233, found 463.2160.

Pure compound **8** was utilized for solid-phase peptide synthesis of K<sup>14</sup>-5-hexynoyl-histone H3 peptide (aa 1-20, >80% purity based on HPLC analysis). This peptide was synthesized by the Proteomics Resource Center at the Rockefeller University.

**Preparation of K<sup>14</sup>-(5-hexynoyl+az-Rho)-histone H3 peptide (1-20) and establishment of a standard curve for quantification of in-gel fluorescent intensity**  
**Scheme S3. Chemical synthesis of K<sup>14</sup>-HR-H3 peptide via CuAAC**

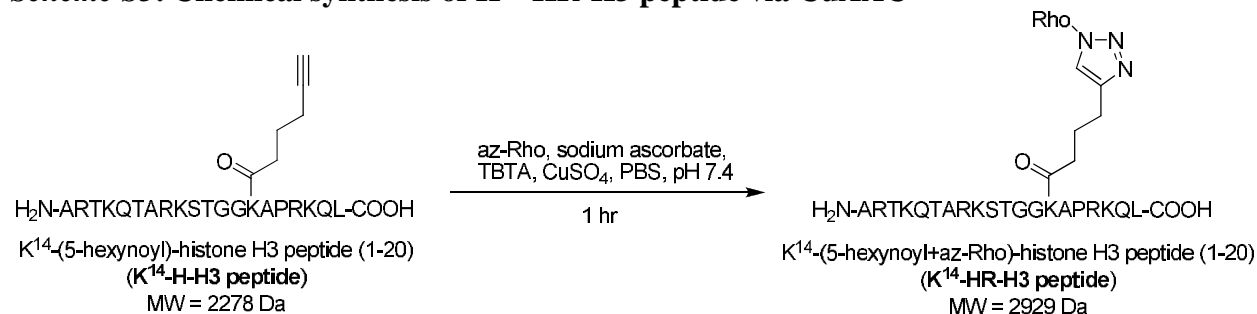

Prepare the stock solution of peptide K<sup>14</sup>-(5-hexynoyl)-histone H3 peptide (aa 1-20) [**K<sup>14</sup>-H-H3 peptide**] (16 mg/mL) in dd H<sub>2</sub>O. To start the synthesis of K<sup>14</sup>-(5-hexynoyl+az-Rho)-histone H3 peptide [**K<sup>14</sup>-HR-H3 peptide**] via CuAAC, an aliquot of K<sup>14</sup>-H-H3 peptide stock solution (1 equiv.) was first added to 1×DIBCO's PBS buffer (133 μg peptide/100 μL PBS buffer) followed by subsequently adding 10 mM az-Rho (2 equiv.), 50 mM sodium ascorbate (3 equiv.), 10 mM TBTA (2 equiv.) and 50 mM CuSO<sub>4</sub> (2 equiv.) to this solution. Vortex the reaction mixture and allow the reaction proceed at room temperature. Base on MALDI-TOF mass analysis, the reaction was complete in one hour. The product K<sup>14</sup>-HR-H3 peptide was purified by preparative HPLC (running from 100% solution A to 15% solution A/85% solution B over 40 min, the product was eluted at 27.5 min. solution A: H<sub>2</sub>O + 0.1% TFA; solution B: CH<sub>3</sub>CN + 0.1% TFA). The peptide product was confirmed by MALDI-TOF. The molecular weight calculated for K<sup>14</sup>-HR-H3 peptide is 2929, the observed value is 2930.4 ([M+H]<sup>+</sup>).

To establish a standard curve for quantification of in-gel fluorescence intensity and for determining the kinetic parameters of 4-pentynoyl-CoA, 1.3 mg of HPLC-purified K<sup>14</sup>-HR-H3 peptide was dissolved in 50 mM, pH 7.9 Tris buffer containing 10% glycerol to make a stock solution (4 nmol/μL). Perform a serial dilution from this stock to prepare several stock solutions of different concentrations ranging from 0.25 pmol/μL to 50 pmol/μL. Took 1 μL aliquot from serially diluted stock solutions individually and added into vials containing a mixture of 11 μL 50 mM, pH 7.9 Tris buffer, 10% glycerol and 8 μL 4% SDS buffer. Load K<sup>14</sup>-HR-H3 peptide from these vials onto 15% Tris-HCl gel and separated by SDS-PAGE (200 Volt, 45 min). The gel was then soaked in destaining solution (40% MeOH, 10% AcOH, 50% H<sub>2</sub>O) for 1 h followed by acquiring its fluorescent image. The resulting image was shown in **Figure S2a**. This experiment was performed in triplicate. The fluorescent intensity of each band was determined (or quantified) by ImageJ (free software). The determined fluorescent intensity versus the amount of K<sup>14</sup>-HR-H3 peptide (or rhodamine dye) was plotted as shown in **Figure S2a**. The fluorescent intensity is linear respect to the amount of K<sup>14</sup>-HR-H3 peptide when the amount of K<sup>14</sup>-HR-H3 peptide is below 10 pmoles.

#### **Determination of $k_{cat}$ and $K_M$ for 4-pentynoyl-CoA in p300-catalyzed *in vitro* acylation**

Kinetic assays were carried out to obtain various initial rates at different 4-pentynoyl-CoA concentrations. The assay was performed by first pre-incubating a mixture of histone H3 protein (1 μg, Millipore) and 4-pentynoyl-CoA (0.1, 0.5, 1, 2.5, 5, 10, 20 or 50 μM) in 11 μL of 50 mM, pH 7.9 Tris buffer (with 10% glycerol) at 30 °C for 10 min followed by adding 1 μL of full-length p300 (33 ng) to initiate reaction and incubated for the indicated time (15, 30 and 45 sec). The reaction was stopped by adding 8 μL of 4% SDS buffer with immediate vortexing. Once the whole assay (there are total 25 reactions including a negative control) was complete, adding freshly prepared “click chemistry cocktail” (100 μM az-Rho, 1 mM TCEP, 100 μM TBTA and 1 mM CuSO<sub>4</sub>) to each reaction vial and allow CuAAC proceed at room temperature for 1 h. The reaction mixture was then loaded and separated on 15% Tris-HCl SDS-PAGE. The gel was then soaked in destaining solution (40% MeOH, 10% AcOH, 50% H<sub>2</sub>O) for 1 h to remove non-covalently bound rhodamine dye followed by acquiring its fluorescent image. The resulting image was shown in **Figure S2b**. The assay was performed in triplicate. The fluorescent intensity of each band was quantified by ImageJ, and then based on the standard curve, each measured value was converted into the amount of rhodamine tag attached to histone H3 (pmoles). The concentration of rhodamine tags attached to histone H3 versus time was then plotted to obtain the initial rate at different concentrations of 4-pentynoyl-CoA. The initial rate (μM/sec)



versus various concentration of 4-pentynoyl-CoA ( $\mu\text{M}$ ) was fitted to Michaelis-Menten equation and plotted using GraphPad Prism 5 to obtain the steady-state kinetic parameters,  $K_M$  and  $V_{\text{max}}$ , for 4-pentynoyl-CoA (shown in **Figure S2b**). The mean values of kinetic parameters derived from triplicate assays are  $K_M = 0.69 \pm 0.12$  ( $\mu\text{M}$ ) and  $k_{\text{cat}} (= V_{\text{max}}/[\text{p300}]) = 2.10 \pm 0.06$  ( $\text{sec}^{-1}$ ).

### **Preparation of sodium 3-butynoate (4), sodium 4-pentynoate (5) and sodium 5-hexynoate (6)**

3-Butynoic acid, 4-pentynoic acid or 5-hexynoic acid (6 mmol) was dissolved in 20 mL ddH<sub>2</sub>O. Aqueous NaOH solution (6 mmol,  $\sim 0.18\text{N}$ ) was added dropwise to reaction mixture. The reaction mixture was then filtered through 0.45  $\mu\text{m}$  membrane, frozen in liquid nitrogen and lyophilized to dryness. All the sodium forms of alkynyl-acetate analogs appeared as white powders. To prepare accurate stock solutions of sodium 3-butynoate, sodium 4-pentynoate and sodium 5-hexynoate, 10 mg of each were dissolved in 600  $\mu\text{L}$  D<sub>2</sub>O. 1.5  $\mu\text{L}$  of anhydrous CH<sub>3</sub>CN was added to each sample as an internal standard for peak integration. After gently vortexing and short spin, 400  $\mu\text{L}$  of the well-mixed solution was transferred into NMR tube for <sup>1</sup>H-NMR analysis as shown in **Figure S3**. To normalize the concentration of each alkynyl-acetate analog added to the cells, we calculated the ratio of the peak integration value of the terminal alkyne proton relative to CH<sub>3</sub>CN proton in each spectrum. Based on these ratios, we adjusted the concentration of acetate analogs to prepare 1M stock solutions.

### **Characterization of alkynyl-acetate analogs**

To calibrate the chemical shifts of each alkynyl-acetate analog, MeOH (0.5  $\mu\text{L}$ ) was added to serve as a NMR calibration standard in D<sub>2</sub>O. The characteristic peaks of MeOH in D<sub>2</sub>O are  $\delta 2.61$  (CH<sub>3</sub>) in <sup>1</sup>H-NMR and  $\delta 49.50$  (CH<sub>3</sub>) in <sup>13</sup>C NMR.

**Sodium 3-butynoate (4):** <sup>1</sup>H NMR (D<sub>2</sub>O, 600 MHz)  $\delta$  3.15 (d, 2H,  $J = 2.7$  Hz), 2.46 (t, 1H,  $J = 2.6$  Hz); <sup>13</sup>C NMR (D<sub>2</sub>O, 150 MHz)  $\delta$  197.76, 101.88, 93.21; HMRS (ESI-TOF) calcd for C<sub>4</sub>H<sub>4</sub>NaO<sub>2</sub> ([M+H]<sup>+</sup>) 107.0109, found 107.0416.

**Sodium 4-pentynoate (5):** <sup>1</sup>H NMR (D<sub>2</sub>O, 600 MHz)  $\delta$  2.36-2.43 (m, 4H), 2.34 (t, 1H,  $J = 2.3$  Hz); <sup>13</sup>C NMR (D<sub>2</sub>O, 150 MHz)  $\delta$  194.33, 98.49, 82.72, 28.34; HMRS (ESI-TOF) calcd for C<sub>5</sub>H<sub>6</sub>NaO<sub>2</sub> ([M+H]<sup>+</sup>) 121.0265, found 121.0184.

**Sodium 5-hexynoate (6):** <sup>1</sup>H NMR (D<sub>2</sub>O, 600 MHz)  $\delta$  2.35 (t, 1H,  $J = 2.7$  Hz), 2.27 (t, 2H,  $J = 7.4$  Hz), 2.21 (td, 2H,  $J = 7.2, 2.6$  Hz), 1.75 (pentet, 2H,  $J = 7.3$  Hz); <sup>13</sup>C NMR (D<sub>2</sub>O, 150 MHz)  $\delta$  195.88, 98.56, 82.53, 37.79, 30.50; HMRS (ESI-TOF) calcd for C<sub>6</sub>H<sub>8</sub>NaO<sub>2</sub> ([M+H]<sup>+</sup>) 135.0422, found 135.0321.

### **Cell Culture**

Jurkat T cells were cultured in tissue culture flasks in RPMI media supplemented with 10% fetal bovine serum (FBS), penicillin (100 units/mL) and streptomycin (0.1 mg/mL). RAW264.7 macrophages, NIH3T3 fibroblasts, HeLa cells, 293T cells, COS-7 cells and DC2.4 cells were cultured in petri dishes in DMEM media supplemented with 10% FBS, penicillin (100 units/mL) and streptomycin (0.1 mg/mL). Cells were incubated in a 5% CO<sub>2</sub> humidified incubator at 37 °C.

### **Metabolic labeling and preparation of total cell lysates**

Jurkat T cells ( $20 \times 10^6$ ) were cultured in 4 mL of RPMI medium 1640 supplemented with 2% FBS, 1% penicillin and streptomycin and labeled with bioorthogonal chemical reporters (from 1

M stock solutions) at the indicated concentration. Trypan blue exclusion was used to determine the cell viability during metabolic labeling. Bioorthogonal chemical reporters did not appear to influence cell viability within the indicated labeling time. At the described time points, cells were harvested and washed twice with PBS. To prepare the total cell lysates, cell pellets were resuspended in 50  $\mu$ L of pre-lysis buffer (7 mM PMSF, 10 $\times$ EDTA-free protease inhibitors, 800  $\mu$ M MgCl<sub>2</sub>, 0.05% SDS, 10 mM triethanolamine, pH 7.4) followed by co-incubating with 0.7  $\mu$ L of benzonase nuclease (Sigma) for 20 min. The cell suspensions were then lysed by adding 150  $\mu$ L of 4% SDS buffer (4% SDS, 150 mM NaCl, 50 mM triethanolamine, pH 7.4) with subsequent vigorous vortexing. Insoluble cell debris was removed by centrifugation at 20000 g for 10 min. The supernatant was collected to yield total cell lysate. Protein concentration was determined by BCA assay.

### **CuAAC reactions and in-gel fluorescence scanning**

For acquiring a typical profile of mammalian acetylome, 50  $\mu$ g of total cell lysates was reacted with freshly pre-mixed “click chemistry cocktail” (100  $\mu$ M az-Rho, 1 mM TCEP, 100  $\mu$ M TBTA and 1 mM CuSO<sub>4</sub>). The final protein concentration was typically 1 mg/mL in 4% SDS buffer. The reaction was allowed to stand at room temperature for 1 h. Proteins were then precipitated by CHCl<sub>3</sub>-MeOH precipitation method and the pellet was washed thrice with chilled MeOH (-20 °C). Dried protein pellets were resuspended in 4% SDS buffer and then separated by SDS-PAGE. The gel was subsequently subjected to in-gel fluorescence scanning to acquire the image.

### **Acid-extraction of core histones**

The method for acid extraction of core histones was based on the reported protocol<sup>7</sup> with some modifications. To Jurkat T cell pellet (10  $\times$  10<sup>6</sup> cells) was added 1 mL of ice-cold hypotonic lysis buffer (10 mM TEA, pH 7.4, 1 mM KCl, 1.5 mM MgCl<sub>2</sub>, 1 mM PMSF, 10 mM SAHA) supplemented with 1 $\times$ EDTA-free protease inhibitor cocktail. The resuspended cells were homogenized by an ice-cold tight-fitting dounce homogenizer and lysed by three cycles of freeze-thaw lysis. Intact nuclei were pelleted by spinning at 10000 g for 10 min at 4 °C. The supernatant was discarded and nuclear pellet was washed twice with ice-cold hypotonic buffer. The nuclear pellet was then resuspended in 0.4N H<sub>2</sub>SO<sub>4</sub> and agitated overnight on rotator at 4 °C. The nuclear debris was pelleted by spinning at 16000 g for 10 min at 4 °C. The supernatant containing extracted core histones were collected and then precipitated with MeOH (5 volume) at -80 °C overnight. Precipitated histone proteins were spun down at 16000 g for 10 min at 4 °C and wash twice with 500  $\mu$ L of ice-cold MeOH. Protein pellets were air-dried at room temperature and then resuspended in dd H<sub>2</sub>O. The histone protein concentration was determined by BCA assay.

### **Histone H3 immunoprecipitation**

Core histones (50  $\mu$ g) extracted from Jurkat T cells described above were co-incubated with anti-histone H3 antibody (1  $\mu$ g, Santa Cruz Biotechnology, C-16), 25  $\mu$ L protein-G agarose bead slurry (Roche) at 4 °C on end-over-end rotator for 2 h. The beads were spun down (10,000 g, 30 sec) and washed thrice with ice-cold modified RIPA lysis buffer (1% Triton X-100, 1% sodium deoxycholate, 0.1% SDS, 150 mM NaCl, 10 mM Tris, pH 7.4 in ddH<sub>2</sub>O). The beads were then resuspended in 20  $\mu$ L of 4% SDS lysis buffer and incubated with 2.5  $\mu$ L of freshly-premixed “click chemistry cocktail” for 1 h at room temperature. 5  $\mu$ L of 4 $\times$ LDS loading buffer and 1  $\mu$ L  $\beta$ -mercaptoethanol were added to each reaction. The mixtures were heated at 95 °C for 5 min and

spun at 1000 g for 30 sec. 25  $\mu$ L of the reaction supernatant was directly loaded onto 15% Tris-HCl gel and separated by SDS-PAGE. The gel was then destained for 2 h at room temperature and scanned by 9400 Typhoon imager.

### Immunoblotting

Proteins separated by SDS-PAGE were transferred onto PVDF membrane. After blocking with 5-10% milk in PBST (PBS with 1% Tween-20), the membrane was washed thrice with PBST and then coincubated with anti-histone H3 antibody (Millipore) or anti-Ac-Lys antibody (Millipore). The following procedures were based on the protocols provided by Millipore.

### Chemical synthesis of azido-diazo-biotin

We employed the diazobenzene linker for CuAAC-based proteomics since this functional group can be efficiently cleaved by mild reduction with sodium dithionite ( $\text{Na}_2\text{S}_2\text{O}_3$ )<sup>8,9</sup>.

#### Scheme S4. Synthesis of azido-diazo-biotin

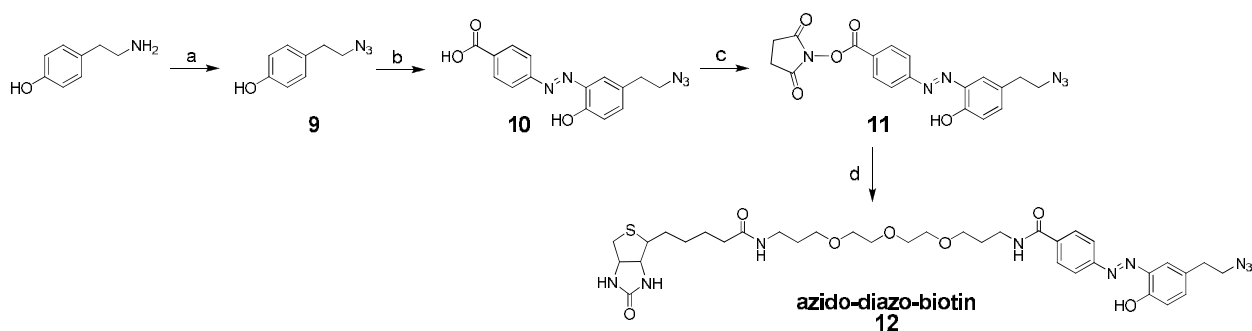

**Scheme S4.** Synthesis of azido-diazo-biotin (**12**): (a)  $\text{TfN}_3$ ,  $\text{ZnCl}_2$ , TEA,  $\text{CH}_3\text{CN}$ ,  $\text{H}_2\text{O}$ , 96% yield; (b) i.  $\text{NaNO}_2$ , 6M HCl, 4-aminobenzoic acid. ii.  $\text{Et}_3\text{N}$ , THF, 45~55% yield over two steps. (c) DCC, N-hydroxysuccinimide, THF, 79%; (d) biotin-PEG-NH<sub>2</sub>, DMF, 80% yield.

**4-(2-azidoethyl)phenol (9)**<sup>10</sup>. To an ice-cooled suspension of  $\text{NaN}_3$  (546 mg, 8.40 mmol) in  $\text{CH}_3\text{CN}$  (10 mL) was slowly added  $\text{Tf}_2\text{O}$  (1.17 mL, 7.00 mmol). The mixture was stirred at 0 °C for 2 h. A solution of tyramine (800 mg, 5.83 mmol) and  $\text{ZnCl}_2$  (79.3 mg, 0.58 mmol) in  $\text{H}_2\text{O}:\text{CH}_3\text{CN}$  (3:7) was added to the reaction mixture, followed by  $\text{Et}_3\text{N}$  (2.40 mL, 17.5 mmol) and freshly prepared  $\text{N}_3\text{Tf}$ . The reaction was kept stirring at rt for 8 h. The reaction mixture was then concentrated under vacuum, dissolved in EtOAc, and washed with  $\text{H}_2\text{O}$  twice. The organic layers were collected, dried over  $\text{MgSO}_4$  and concentrated. The crude product was purified by flash column chromatography (25% EtOAc in hexane) to give colorless 4-(2-azidoethyl)phenol (915 mg, 5.61 mmol, 96%)<sup>9a</sup>. <sup>1</sup>H-NMR ( $\text{CDCl}_3$ , 400 MHz):  $\delta$  7.08 (d, 2H,  $J = 8.4$  Hz), 6.78 (d, 2H,  $J = 8.4$  Hz), 3.45 (t, 2H,  $J = 7.2$  Hz), 2.82 (t, 2H,  $J = 7.2$  Hz); <sup>13</sup>C-NMR ( $\text{CDCl}_3$ , 100 MHz):  $\delta$  154.3, 130.1, 129.9, 115.4, 52.6, 34.4.

**(E)-4-((5-(2-azidoethyl)-2-hydroxyphenyl)diazenyl)benzoic acid (10)**. Solid  $\text{NaNO}_2$  (3.30 g, 6.55 mmol) was added to an ice-cooled suspension of 4-aminobenzoic acid in 6M HCl (40 mL). The resulting mixture was stirred at 0 °C and turned into a yellow-colored solution. In the meantime, dissolving 4-(2-azidoethyl)phenol (**9**) (1.19 g, 7.30 mmol) in cooled THF (15 mL) at 0 °C, and subsequently added  $\text{K}_2\text{CO}_3$  to this solution to adjust pH to 8. After 40 min, the

diazonium salt solution was slowly added to compound **2** at 0 °C, while the pH was kept around 8 by adding more K<sub>2</sub>CO<sub>3</sub>. Once the reaction was complete, removed all the solvents under vacuum. The concentrated residue was then re-dissolved in ethyl acetate, and washed with acidified H<sub>2</sub>O (pH 2~3) for three times. The organic layers were collected, dried over MgSO<sub>4</sub> and concentrated. The crude product was purified by silica gel flash column chromatography (33% EtOAc in hexane and then 10% MeOH in CH<sub>2</sub>Cl<sub>2</sub>) to give yellow-colored compound **2** (1.27 g, 4.08 mmol, 56%). <sup>1</sup>H-NMR (CD<sub>3</sub>OD, 600 MHz) δ: 8.24 (d, 2H, *J* = 8.5 Hz), 8.05 (d, 2H, *J* = 8.5 Hz), 7.89 (d, 1H, *J* = 1.9 Hz), 7.40 (dd, 1H, *J* = 8.3, 2.0 Hz), 7.04 (d, 1H, *J* = 8.4 Hz), 3.61 (t, 2H, *J* = 7.0 Hz), 2.97 (t, 2H, *J* = 7.0 Hz); <sup>13</sup>C-NMR (CD<sub>3</sub>OD, 150 MHz) δ: 176.6, 163.9, 163.8, 148.3, 144.9, 140.4, 139.6, 132.5, 131.3, 128.2, 61.4, 43.3. ESI-MS calcd. for C<sub>15</sub>H<sub>13</sub>N<sub>5</sub>O<sub>3</sub> [M-H]<sup>-</sup>: 310.0940, found 310.2.

**(E)-2,5-dioxopyrrolidin-1-yl 4-((5-(2-azidoethyl)-2-hydroxyphenyl)diazenyl)**

**benzoate (11):** To compound **10** (164 mg, 0.53 mmol) dissolved in anhydrous THF (20 mL) was added DCC (119 mg, 0.58 mmol) and N-hydroxy-succinimide (66.7 mg, 0.58 mmol) under Ar. After the reaction was stirred at room temperature for 4 h and concentrated *in vacuo*. The crude solid residue was then dissolved in chilled ethyl acetate and the urea was filtered off. The filtrate was then concentrated and purified by silica gel flash column chromatography (33% EtOAc in hexane) to give yellow-colored compound **11** (170 mg, 79%). <sup>1</sup>H-NMR (CDCl<sub>3</sub>, 600 MHz): δ 8.31 (d, 2H, *J* = 8.3 Hz), 8.00 (d, 2H, *J* = 8.3 Hz), 7.87 (d, 1H, *J* = 1.9 Hz), 7.31 (dd, 1H, *J* = 8.5, 2.0 Hz), 7.05 (d, 1H, *J* = 8.5 Hz), 3.60 (t, 2H, *J* = 7.0 Hz), 2.95-2.98 (m, 6H); <sup>13</sup>C-NMR (CDCl<sub>3</sub>, 150 MHz): δ 169.1, 161.2, 154.3, 151.7, 137.4, 135.3, 133.6, 131.9, 130.0, 126.6, 122.4, 118.7, 52.4, 34.2, 25.7. ESI-MS calcd. for C<sub>19</sub>H<sub>16</sub>N<sub>6</sub>O<sub>5</sub> [M+H]<sup>+</sup>: 409.1260, found 409.3.

**(E)-4-((5-(2-azidoethyl)-2-hydroxyphenyl)diazenyl)-N-(15-oxo-19-(2-oxohexahydro-1H-**

**thieno[3,4-d]imidazol-4-yl)-4,7,10-trioxa-14-azanonadecyl)benzamide (12):** To compound **11** (13 mg, 0.03 mmol) dissolved in anhydrous DMF (3 mL) was added biotin-PEG-NH<sub>2</sub><sup>11</sup> (27.0 mg, 0.06 mmol). The reaction was complete after stirring at room temperature for 10 h and concentrated. The crude product was dissolved in CH<sub>3</sub>CN:H<sub>2</sub>O (1:1) and purified by reversed preparative HPLC column (CH<sub>3</sub>CN: 5% to 40% in 10 min, then 40% to 100% in 40 min, compound **12** was eluted at 33 min) to give yellow-colored product (18.0 mg, 80%). <sup>1</sup>H-NMR (CD<sub>3</sub>OD, 400 MHz): δ 8.44 (brs, 1H), 8.00 (brs, 4H), 7.83 (d, 1H, *J* = 2.0 Hz), 7.33 (dd, 1H, *J* = 8.5, 2.0 Hz), 6.99 (d, 1H, *J* = 8.4 Hz), 4.46 (dd, 1H, *J* = 7.7, 5.0 Hz), 4.27 (dd, 1H, *J* = 7.8, 4.4 Hz), 3.66-3.47 (m, 18H), 3.23 (t, 2H, *J* = 6.7 Hz), 3.16 (td, 1H, *J* = 4.6, 9.2 Hz), 2.92 (t, 2H, *J* = 7.0 Hz), 2.68 (d, 1H, *J* = 12.7 Hz), 2.16 (t, 2H, *J* = 7.3 Hz), 1.93 (t, 1H, *J* = 6.3 Hz), 1.89 (t, 1H, *J* = 6.3 Hz), 1.76-1.52 (m, 6H), 1.42 (t, 1H, *J* = 7.6 Hz), 1.38 (t, 1H, *J* = 7.7 Hz), 1.28 (brs, 2H), 0.89 (m, 1H); <sup>13</sup>C-NMR (CD<sub>3</sub>OD, 100 MHz): δ 175.9, 169.1, 166.1, 154.3, 153.3, 139.0, 137.8, 135.8, 131.8, 131.3, 129.6, 123.4, 119.3, 71.5, 71.3, 71.2, 70.3, 63.3, 61.6, 57.0, 53.5, 41.0, 38.9, 37.8, 36.8, 35.1, 30.7, 30.4, 29.8, 29.4, 26.8. MALDI-TOF calcd. for C<sub>35</sub>H<sub>49</sub>N<sub>9</sub>O<sub>7</sub>S [M+Na]<sup>+</sup>: 762.8744, found: 762.26.

**Proteomic analysis of alkynyl-acetate analogs-labeled proteins**

3-Butynoate-, 4-pentynoate- or 5-hexynoate-labeled total cell lysates (15-25 mg) were diluted into 4% SDS buffer (the final protein concentration = 1 mg/mL) and reacted with freshly pre-mixed “click chemistry cocktail” (100 μM azido-diazo-biotin tag, 1 mM TCEP, 100 μM TBTA and 1 mM CuSO<sub>4</sub>) for 2 h at room temperature (**Figure S7**). Proteins were then precipitated by

MeOH (5 volume) at -20 °C overnight. Precipitated proteins were centrifuged at 5,200 g for 30 min at 4 °C and washed thrice with ice-cold MeOH. To capture the biotinylated proteins by streptavidin beads, the air-dried protein pellet was resuspended in 2-3 mL of 4% SDS buffer containing 10 mM EDTA and subsequently the protein suspension was diluted into NP-40 lysis buffer (1% NP-40, 150 mM NaCl, 50 mM Tris, pH 8.0) to reduce SDS concentration down to 1-1.5%. Pre-washed streptavidin beads were then incubated with this protein solution at room temperature for 1 h on end-over-end rotator. The captured proteins were sequentially washed thrice with the incubation buffer, modified RIPA lysis buffer (1% Triton X-100, 1% sodium deoxycholate, 0.1% SDS, 150 mM NaCl, 10 mM Tris, pH 7.4), 1 × GIBCO's PBS (+ 0.2% SDS), PBS and ammonium bicarbonate (ABC). For cysteine reduction and alkylation, incubating the captured proteins with freshly-made 2 mM dithiothreitol in 8M urea for 10 min followed by alkylation for another 30 min with freshly prepared iodoacetamide (the final concentration is 6 mM). Wash the captured proteins with ABC buffer thrice. To release the proteins from the streptavidin beads, the beads were resuspended in ABC buffer and transferred to a dolphin tube. Pellet the beads, and elute the captured proteins by incubating the beads with elution solution (0.01% SDS, 25 mM sodium dithionite, 50 mM ABC buffer) for 1 h at room temperature. Spin down the beads and collect the eluent. Repeat the same elution procedure for 1-2 times. Concentrate the eluent by using the microcon centrifugal filter device (10 kDa NMWL). The concentrated eluent was then dried in SpeedVac. Resuspend the dried pellets in 1×LDS/5% β-mercaptoethanol. 60% volume of this resuspended solution was loaded onto SDS-PAGE for in-gel trypsin digestion, while the remaining sample was loaded onto another SDS-PAGE for validation of protein candidates by Western blot.

The resultant enriched sodium 3-butynoate-, sodium 4-pentynoate- or sodium 5-hexynoate-labeled proteome was visualized by coomassie blue staining. The gel images were shown in **Figure S7b** and **Figure S8a**. Each lane was sliced into 8 or 12 fractions. Each excised gel slice was placed in microcentrifuge tube. The gel slices were further cut into more pieces, washed with 50 mM ammonium bicarbonate (ABC) twice, destained with 50 mM ABC/acetonitrile (50/50) twice, and then dehydrated in 100% acetonitrile. After drying the gel pieces in a SpeedVac, gel pieces were rehydrated with trypsin solution (2 µg of trypsin for each vial/gel slice) and incubated in 37 °C water bath for 18 h. The eluted trypsin-digested peptides were then collected and dried in SpeedVac. Resuspended the dried eluents in H<sub>2</sub>O (with 0.1% TFA) and submitted the samples to nano-HPLC/MS/MS analysis (Thermo LTQ-Orbitrap in the Proteomic Resource Center at Rockefeller University).

### **Mapping the modification sites of 4-pentynoate-metabolically labeled proteins**

For modification site-mapping experiments, 20 mg of 4-pentynoate-labeled-Jurkat T cell lysates was subjected to CuAAC reaction with azido-diazo-biotin, followed by MeOH precipitation for overnight at -20 °C. The precipitated proteins were pelleted, washed and air-dried. Resuspend the protein pellet in 8M urea. To reduce and alkylate cysteine residues, the proteins were first treated with 2 mM dithiothreitol for 30 min, and then treated with 6 mM iodoacetamide for 30 min. To remove the reducing and alkylating reagents, the proteins were precipitated in MeOH at -20 °C for overnight; afterwards, the protein pellet was washed thrice with ice-cold MeOH. Resuspend the air-dried protein pellet in freshly-prepared 8M urea. Upon the majority of protein was solubilized, the concentration of urea was reduced to 1.5 M by diluting into 50 mM ABC buffer. Solubilized proteins were then subjected to trypsin digestion (1:50 w/w) in the presence of 20 mM methylamine at 37 °C for overnight. The extent of trypsin digestion was determined by

MALDI-TOF and SDS-PAGE. To enrich the biotinylated peptides, the trypsin-digested peptides were incubated with pre-washed streptavidin beads for 2 h at room temperature on end-over-end rotator. Wash the beads sequentially with 1.5 M Urea, 1×DIBCO's PBS (+ 0.2% SDS), 1×PBS and ammonium bicarbonate (ABC). To elute the bound peptides, the beads were transferred to dolphin tubes and then incubated with the elution buffer (0.01% SDS, 25 mM sodium dithionite, 50 mM ABC buffer) for 1 h at room temperature. Pellet the beads and collect the eluent. Repeat the cleavage step once. Dry the eluent in SpeedVac, and then resuspend the dried peptides in dd H<sub>2</sub>O (+ 0.1% TFA). The peptides were cleaned up by C8 cartridge (Waters), eluted with 70% CH<sub>3</sub>CN + 20% H<sub>2</sub>O + 0.1% TFA and dried in SpeedVac. The details of analysis of raw tandem mass spectra and selection criterion for candidate proteins have been described, however, the mass of 258.1117, corresponding to the triazole tag (**Figure S7a**), was included here as a variable lysine modification in order to search for 4-pentynoate-modification sites. In addition, to investigate the labeling specificity of 4-pentynoate in cells, we searched for other amino acid residues that can be potentially modified by 4-pentynoate, including N-terminal amine, serine, threonine and cysteine. Moreover, to elucidate whether the chain length of 4-pentynoate could possibly be altered in cellular biosynthetic machineries; we searched for different chain-lengths of triazole tag as variable modifications on lysine residues (the set carbon number for acyl-moiety of triazole tag ranges from 1 to 18). The experimental results were shown in **Figure S9**.

**Figure S1. Characterization of p300-catalyzed *in vitro* acylation on histone H3 peptide and histone H3.** (a) Analysis of the crude *in vitro* acylation products of histone H3 peptide by MALDI-TOF mass spectrometry. 25 pmol of H3 peptide [aa 2-21 (L21Y): ARTKQTARKSTGGKAPRKQY] and 20  $\mu$ M of acetyl-CoA or alkynyl-acetyl-CoA analogs were subjected to *in vitro* acylation condition. The peptide products were extracted with ZipTip (Millipore) for MS analysis. (b) HPLC chromatographs for the stability experiments of acetyl-CoA and alkynyl-acetyl-CoA analogs. The time on the top left corner indicates the incubation time of peptide at 30 °C. These stability experiments were monitored by UV absorption (Abs) at 210 nm. (c) Crude *in vitro* acylation products of histone H3 (~1.7  $\mu$ g) resolved on 15% SDS-PAGE. The gel slices containing histone H3 were later excised from the gels and subjected to in-gel trypsin digestion followed by MS analysis to determine the modification sites. (d) Selected MS/MS spectra of peptides derived from in-gel trypsin digestion of *in vitro* acylated histone H3 products. (e) In-gel fluorescent detection of *in vitro* histone H3 acylation with 4-pentynoyl-CoA under various p300 concentrations. Histone H3 (~1.7  $\mu$ g) was co-incubated with 50  $\mu$ M 4-pentynoyl-CoA and p300 of various concentrations at 30 °C for 10 min. The reaction was stopped by adding 2/3 reaction volume of 4% SDS buffer, followed by CuAAC with az-Rho. The reaction mixture was loaded onto 15% Tris-HCl and separated by SDS-PAGE. The gel was first soaked in destaining solution for 1.5 h and then subjected to in-gel fluorescence image acquisition. (f) In-gel fluorescent detection of *in vitro* time-dependent acylation of histone H3 and p300 with 4-pentynoyl-CoA. Histone H3 (~1.7  $\mu$ g) were co-incubated with p300 [60 ng (top) or 120 ng (bottom)] and 4-pentynoyl-CoA [50  $\mu$ M (top) or 160  $\mu$ M (bottom)] at 30 °C for the indicated time. The reaction was stopped by adding 2/3 reaction volume of 4% SDS buffer (4% SDS, 150 mM NaCl, 50 mM triethanolamine, pH 7.4), followed by reacting with az-Rho via CuAAC, separated on 15% Tris-HCl SDS-PAGE, destaining for 1 h and in-gel fluorescence scanning. Comparable levels of protein loading are demonstrated by coomassie blue (CB) staining.

**a**

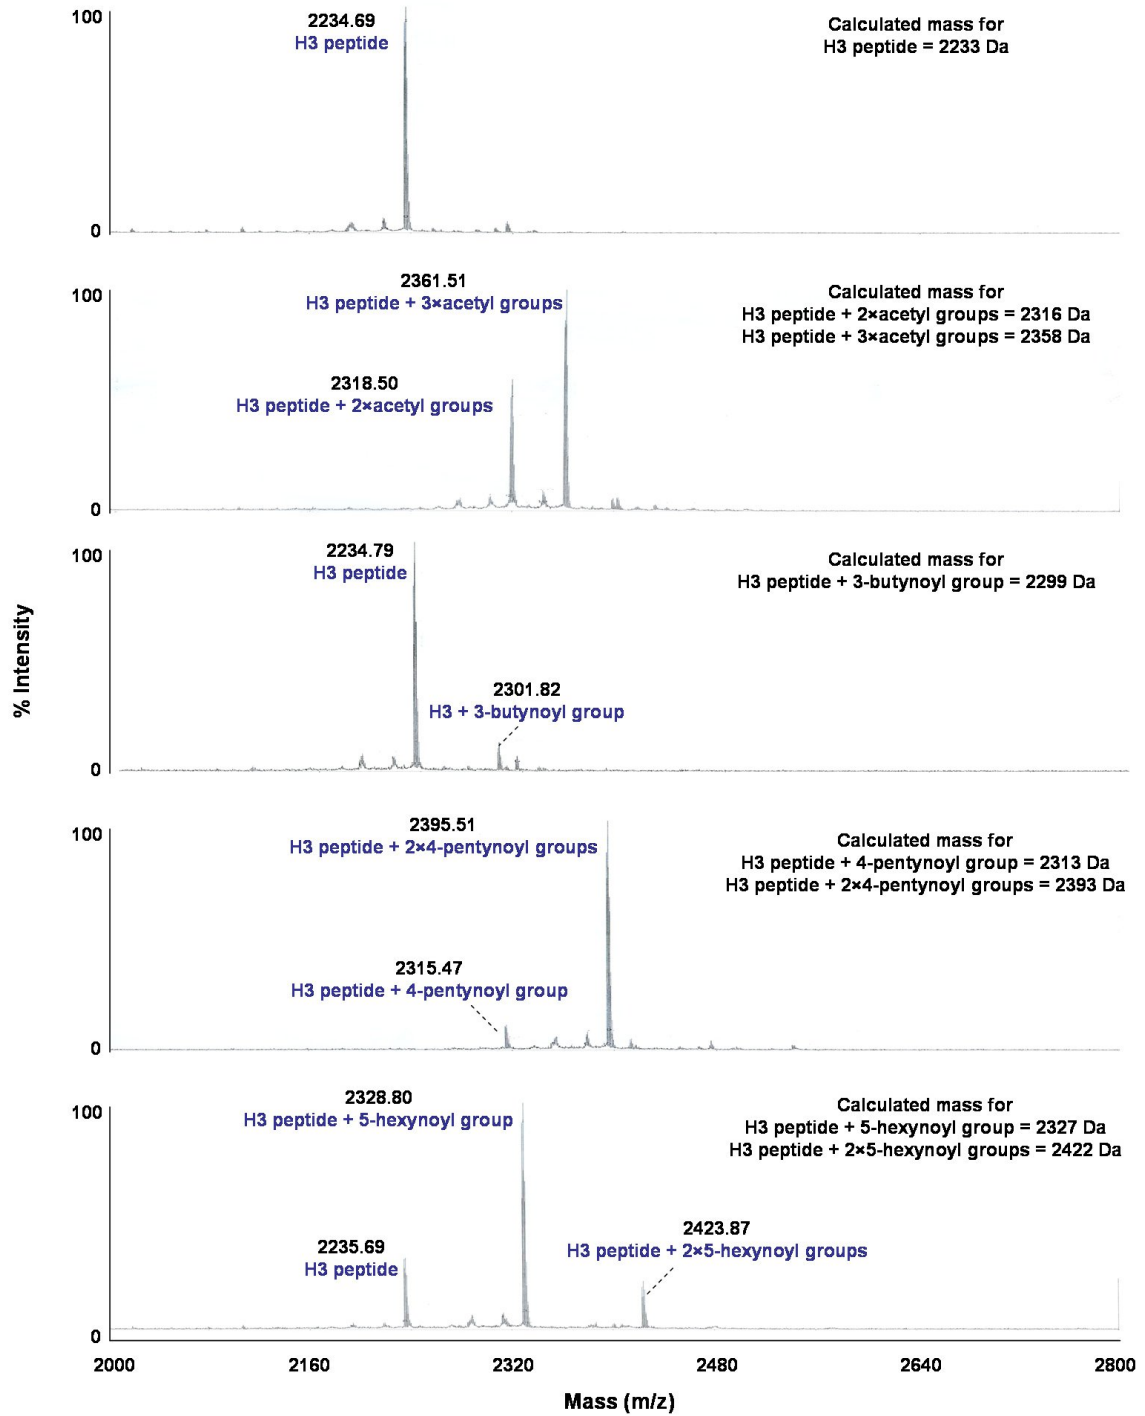



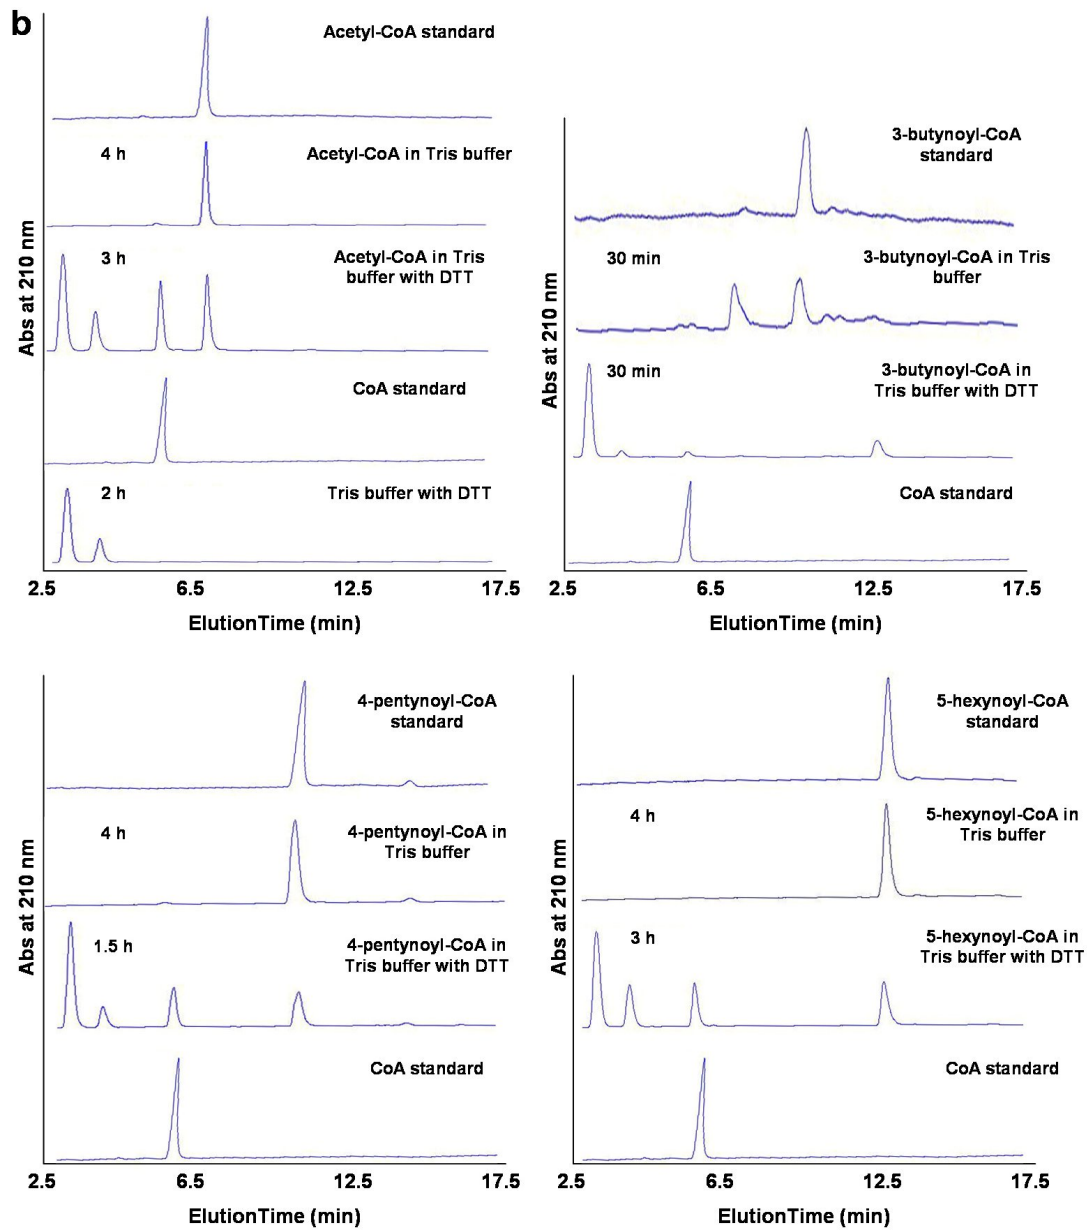

**C**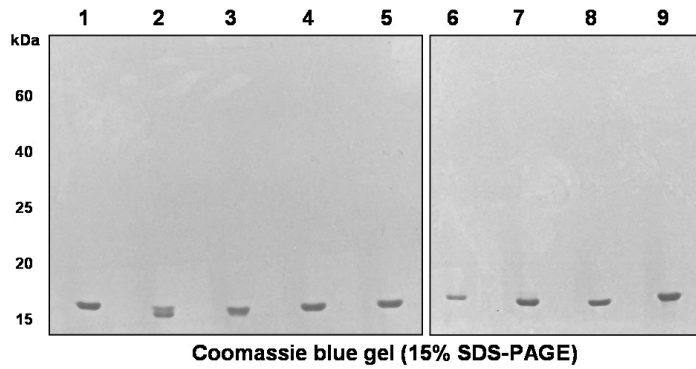

Lane 1: histone H3  
 Lane 2: histone H3 + acetyl-CoA + p300  
 Lane 3: histone H3 + 4-pentynoyl-CoA + p300  
 Lane 4: histone H3 + acetyl-CoA  
 Lane 5: histone H3 + 4-pentynoyl-CoA  
 Lane 6: histone H3 + 3-butynoyl-CoA  
 Lane 7: histone H3 + 3-butynoyl-CoA + p300  
 Lane 8: histone H3 + 5-hexynoyl-CoA  
 Lane 9: histone H3 + 5-hexynoyl-CoA + p300

**d**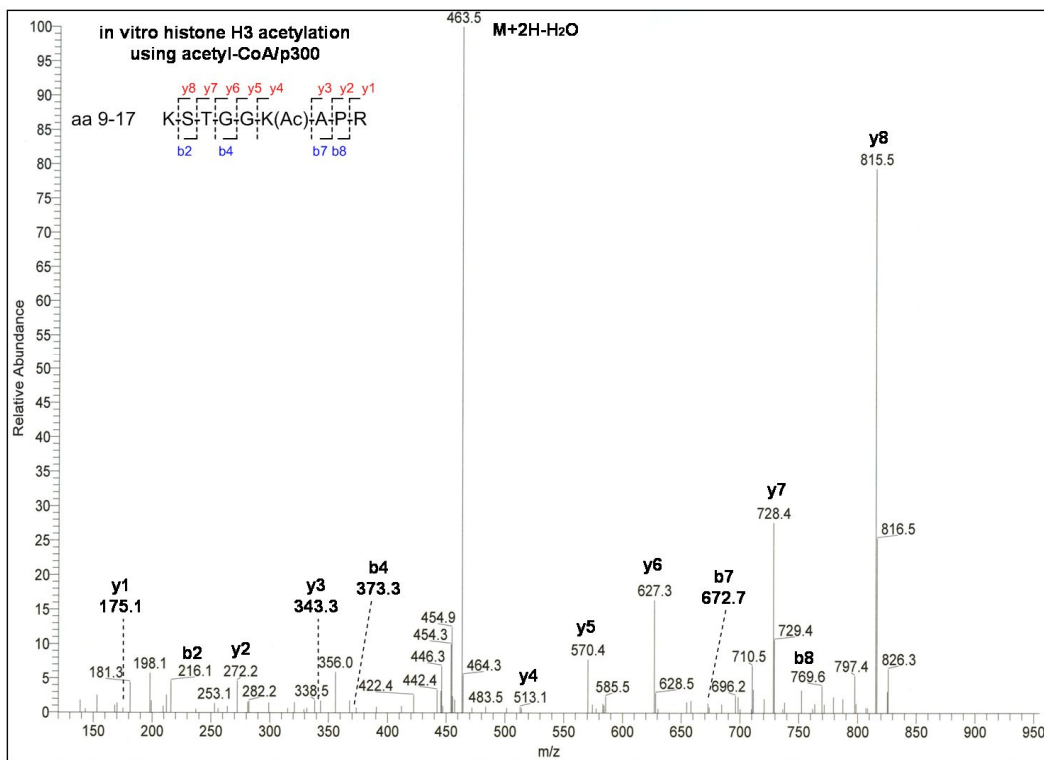



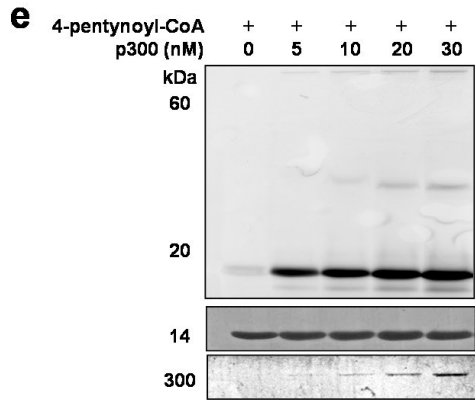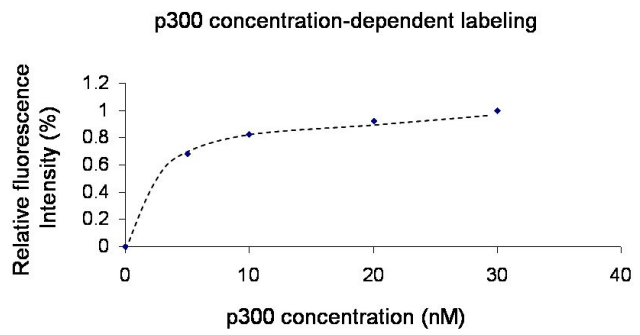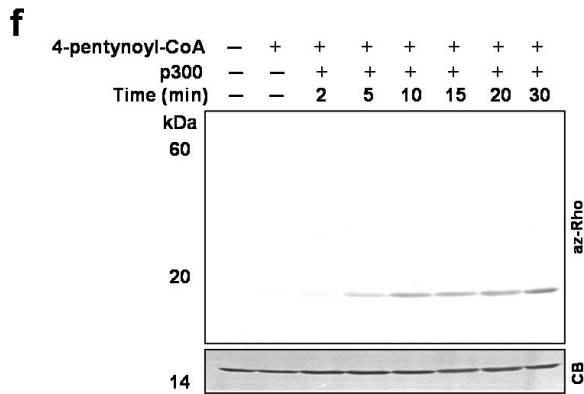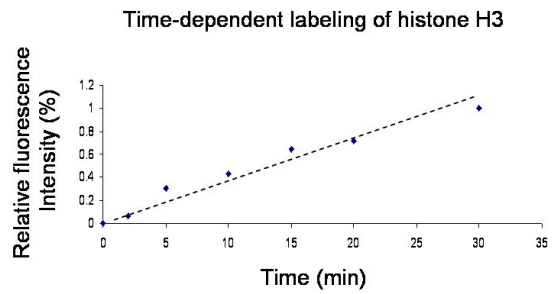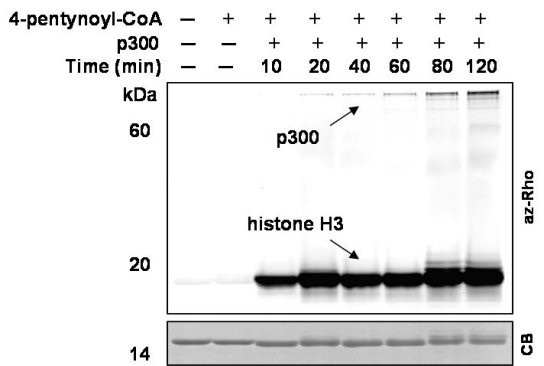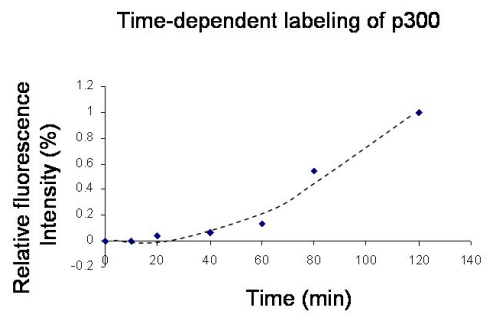

**Table S1. List of peptide spectral counts acquired from in-gel trypsin digestion of *in vitro* acetylated and acylated histone H3.** The coomassie gel and selected MS/MS spectra were shown in **Figure S1c,d**. Raw tandem mass spectra were searched against the human IPI protein database version 3.56 using SEQUEST search engine (Thermo Scientific). Cysteine carbamidomethylation was searched as fixed modification, while methionine/tryptophan oxidation, asparagines/glutamine deamidation, lysine/serine/threonine/cysteine acetylation/4-pentynylation/5-hexynylation, N-terminal acetylation/4-pentynylation/5-hexynylation were searched as variable modifications. Each peptide spectrum must meet several selection thresholds including >95% for peptide identification probability, >1.0 for SEQUEST XCorr score, and  $\pm 6$  ppm for actual minus calculated peptide mass. Those lysine-modified peptides listed in control experiments (H3+AcCoA, H3+2 and H3+3) were derived from p300-independent acetylation/acylation (AcCoA: acetyl-CoA, 2: 4-pentynoyl-CoA, 3: 5-hexynoyl-CoA). For each chosen lysine-modified peptide, the spectral count ratio of p300-catalyzed modification/control must be greater than 2.

| Peptide Sequence (K: modified residue) | Spectral Counts of Peptide |          |               |      |           |      |           |
|----------------------------------------|----------------------------|----------|---------------|------|-----------|------|-----------|
|                                        | H3                         | H3+AcCoA | H3+AcCoA+p300 | H3+2 | H3+2+p300 | H3+3 | H3+3+p300 |
| KQLATK (18-23)                         |                            |          |               |      |           | 4    | 10        |
| KSAPATGGVK (27-36)                     | 28                         | 21       | 6             | 23   | 17        | 36   | 38        |
| SAPATGGVK (28-36)                      | 3                          | 2        |               | 9    | 7         | 12   | 17        |
| YRPGTVLR (41-49)                       | 1                          | 3        | 2             | 2    | 3         | 47   | 57        |
| STELLIR (57-63)                        |                            |          |               |      |           | 7    | 16        |
| KLPFQR (64-69)                         |                            |          | 1             | 1    |           |      | 8         |
| EIAQDFK (73-79)                        | 25                         | 23       | 22            | 27   | 25        | 74   | 89        |
| RVTIMPK (116-122)                      |                            |          |               |      |           | 1    |           |
| VTIMPK (117-122)                       | 5                          | 10       | 1             | 5    | 4         | 3    | 8         |
| KSTGGKAPR (9-17, K14)                  |                            | 1        | 8             |      | 16        | 2    | 11        |
| KSTGGKAPR (9-17, K9, K14)              |                            | 18       | 60            |      | 12        |      | 2         |
| STGGKAPR (10-17, K14)                  |                            |          |               |      | 9         |      |           |
| KQLATK (18-23, K18)                    |                            |          | 2             |      | 10        | 2    | 19        |
| KQLATKAAR (18-26, K23)                 |                            |          |               | 1    | 3         |      |           |
| KQLATKAAR (18-26, K18, K23)            |                            | 4        | 138           |      | 18        |      | 18        |
| QLATKAAR (19-26, K23)                  |                            |          | 1             |      |           |      | 1         |
| KSAPATGGVK (27-36, K27)                |                            | 12       | 34            | 3    | 25        | 2    | 12        |
| KSAPATGGVK (27-36, K27, K36)           |                            |          | 4             |      |           |      |           |
| KSAPATGGVKKPHR (27-40, K27, K36)       |                            |          | 34            |      | 6         |      |           |
| KSAPATGGVKKPHR (27-40, K27, K36, K37)  |                            |          | 28            |      |           |      |           |
| RYQKSTELLIR (53-63, K56)               |                            | 2        | 5             |      |           |      |           |
| RVTIMPKDIQLAR (116-128, K122)          |                            |          | 2             |      |           |      |           |
| VTIMPKDIQLAR (117-128, K122)           |                            |          | 2             |      |           |      |           |

◆ Peptide sequences acquired from 3-butynoyl-CoA-participating *in vitro* histone H3 acylation are not included in this table. Based on MS/MS data, there were no histone H3 peptides modified by 3-butynoyl group.

**Figure S2. Standard curve for quantification of in-gel fluorescence intensity and determination of the kinetic parameters for 4-pentynoyl-CoA in p300-catalyzed histone H3 acylation.** (a) (Left) The in-gel fluorescence image of a serially diluted K<sup>14</sup>-HR-H3 peptide resolved on 15% Tris-HCl SDS-PAGE. (Right) A plot of in-gel fluorescence intensity versus various amount of K<sup>14</sup>-HR-H3 peptide. The in-gel fluorescence intensity of each band on the left gel was determined by ImageJ. The measured values were then plotted versus the amount of K<sup>14</sup>-HR-H3 peptide to give a standard curve ( $y = 10.86x$  when  $x < 10$  pmol). The curve appears non-linear when  $x$  is larger than 10 pmol. Notably, this fluorescence intensity was determined on the Tiff format of the original gel file. When the fluorescence intensity was determined based on the original gel format, the equation of the standard curve will be  $y = 2133.6x$ ,  $x < 10$ ) (b) (Top) In-gel fluorescent image of the steady-state kinetic assay to determine the initial rates of p300-catalyzed histone H3 acylation at different 4-pentynoyl-CoA concentrations. The assay was carried out with 4-pentynoyl-CoA of various concentrations and allowed to proceed for various time lengths in order to obtain the initial rates at different 4-pentynoyl-CoA concentrations. The complete acylation reactions were then CuAAC with az-Rho for 1 h. Separated the reaction mixtures on 15% Tris-HCl SDS-PAGE, followed by destaining for 1 h and then acquiring the in-gel fluorescence image. (Bottom) A plot of initial rates versus 4-pentynoyl-CoA concentrations and the determined steady-state kinetic parameters for 4-pentynoyl-CoA.

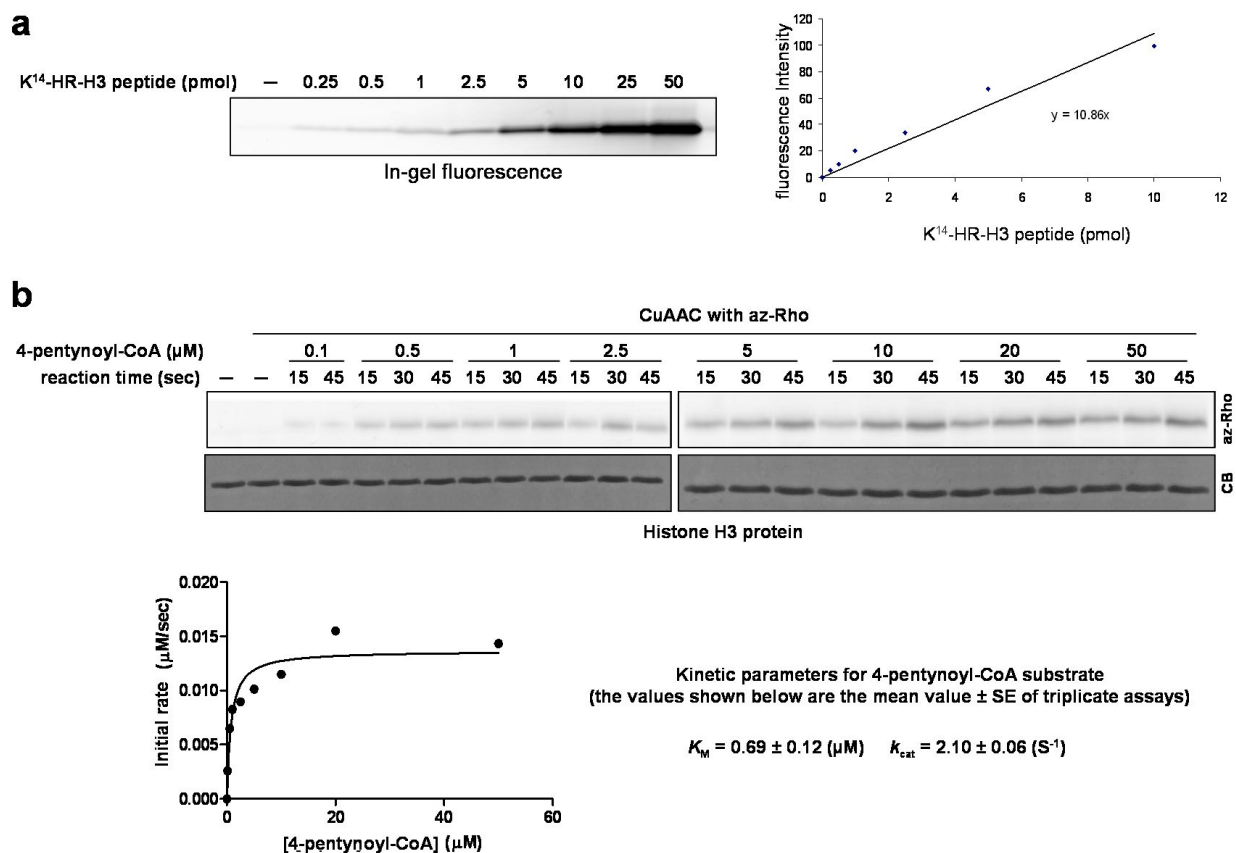

**Figure S3.**  $^1\text{H-NMR}$  spectra of sodium 3-butynoate (4), sodium 4-pentynoate (5) and sodium 5-hexynoate (6).

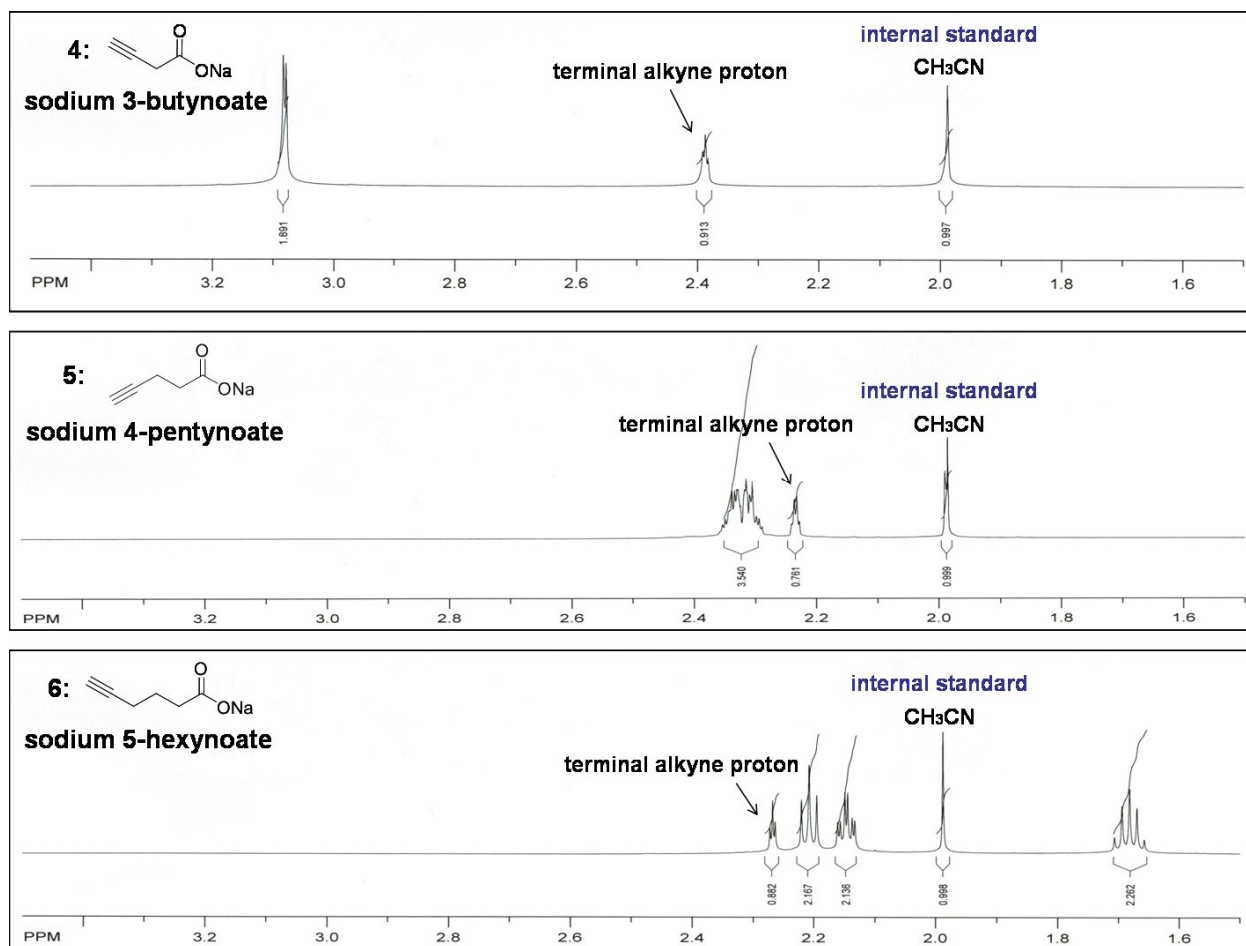

**Figure S4. Time- and dose-dependent metabolic labeling of mammalian cells with sodium 3-butynoate (4), sodium 4-pentynoate (5) or sodium 5-hexynoate (6).** (a) Dose-dependent labeling of Jurkat T cells. Jurkat T cells were labeled with different concentrations of sodium 3-butynoate, sodium 4-pentynoate or sodium 5-hexynoate, and harvested after 6 h incubation. The lysates were reacted with az-Rho and analyzed by in-gel fluorescence scanning. (b) Time-dependent labeling of Jurkat T cells. 32 mL (4 mL  $\times$  8) of Jurkat T cells were labeled with 5 mM of sodium 3-butynoate, sodium 4-pentynoate or sodium 5-hexynoate for different time length. At each time point, 4 mL of labeling cells were collected, spun down and frozen in liquid nitrogen. Negative control (dd H<sub>2</sub>O) was carried out in a separate flask. The lysates were reacted with az-Rho and analyzed by in-gel fluorescence scanning.

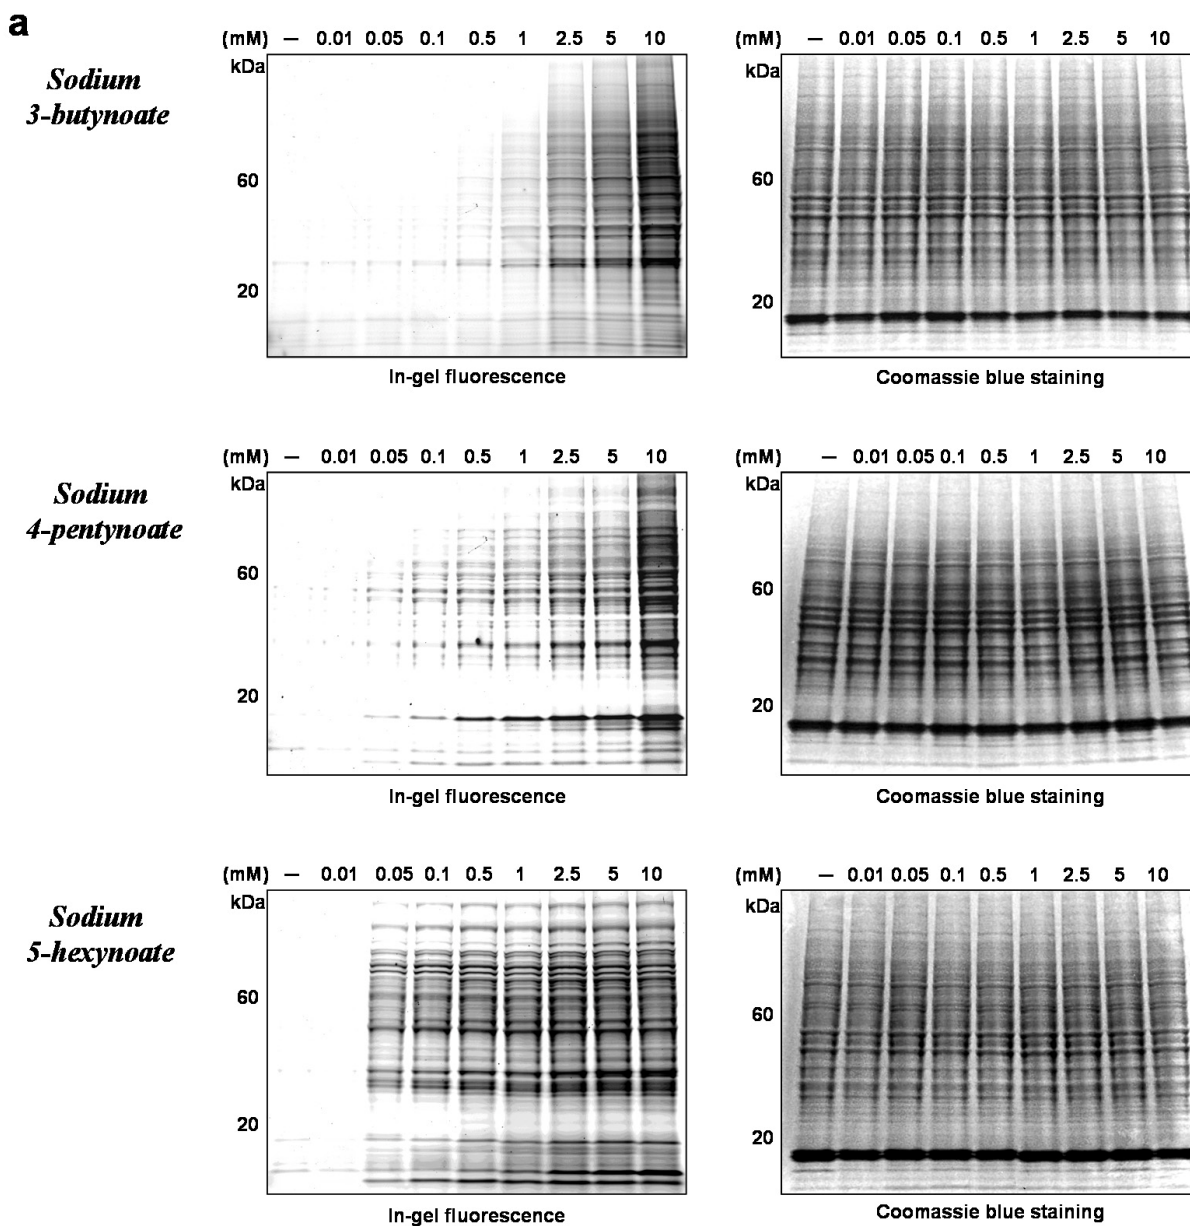



**b**

*Sodium*  
*3-butynoate*

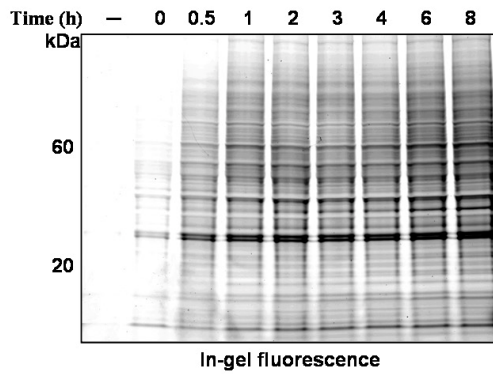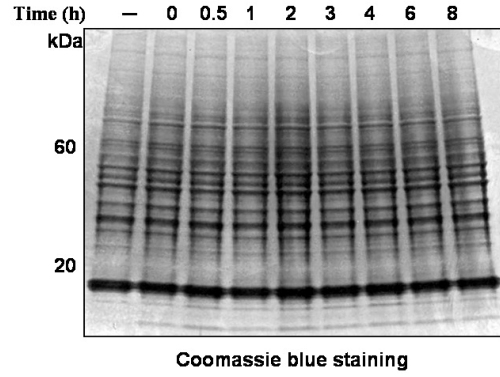

*Sodium*  
*4-pentynoate*

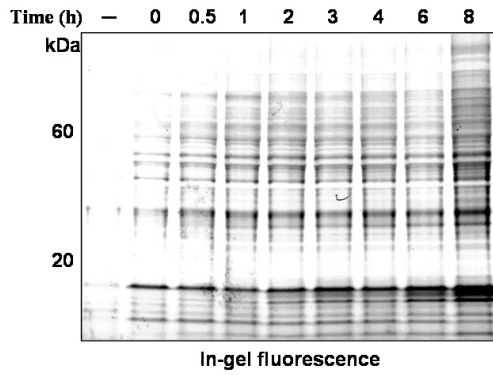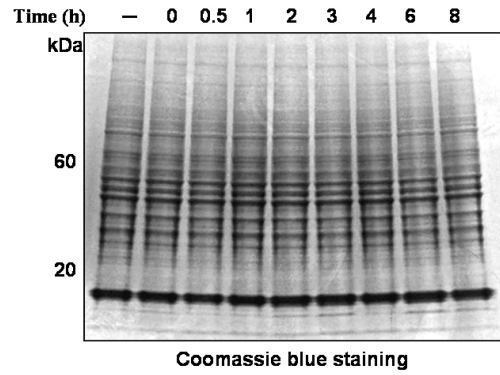

*Sodium*  
*5-hexynoate*

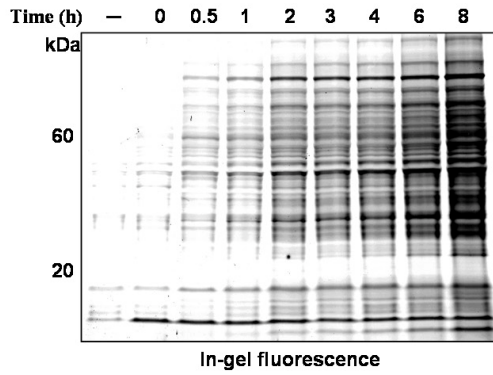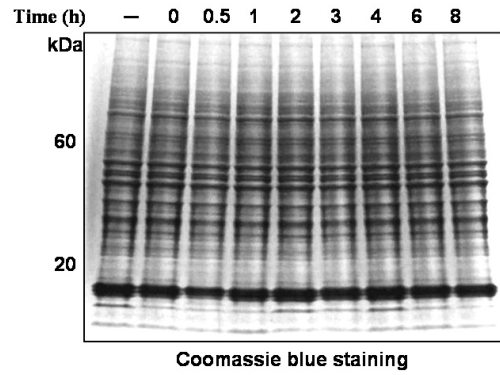

**Figure S5. Specificity of sodium 3-butynoate (4), sodium 4-pentynoate (5) and sodium 5-hexynoate (6) metabolic labeling in mammalian cells.** (a) Inhibition of cellular protein biosynthesis by cycloheximide (CHX) in the presence of alkynyl-acetate analogs (10 mM), alkynyl-fatty-acid analogs (20  $\mu$ M)<sup>5</sup> and AHA (azidohomoalanine, 4 mM)<sup>12</sup>. In this experiment, Jurkat T cells were either labeled with the chemical reporter alone for 1 h, or pre-treated with 100  $\mu$ M CHX for 0.5 h and then labeled with the chemical reporter for additional 1 h. Cells labeled with AHA were cultured in HEPES-buffered saline (10 mM HEPES, 119 mM NaCl, 2 mM CaCl<sub>2</sub>, 2 mM MgCl<sub>2</sub>, 5 mM KCl and 30 mM glucose)<sup>12</sup>. In the presence of 100  $\mu$ M CHX, the incorporation of methionine surrogate, AHA, into proteins was completely blocked. As demonstrated in fatty-acylation by alk-12 (mainly target N-myristoylation) and alk-16 (mainly target cysteine palmitoylation), CHX diminished N-acylation, therefore, CHX can reveal the difference of labeling patterns between lysine acylation and N-terminal acylation labeled by alkynyl-acetate analogs in the leftmost figure. All the lysates were reacted with az-Rho and analyzed by in-gel fluorescence scanning. (b) Comparison of protein labeling profiles and labeling efficiencies among alkynyl-acetate analogs and alkynyl-fatty-acid analogs in Jurkat T cells. In this experiment, cells were labeled with 5 mM of sodium 3-butynoate, sodium 4-pentynoate and sodium 5-hexynoate and 20  $\mu$ M of alk-12 and alk-16 for 6 h. The lysates were reacted with az-Rho and analyzed by in-gel fluorescence scanning. (c) Inhibition of HDACs by SAHA (suberoylanilide hydroxamic acid). SAHA induced changes in protein labeling profiles of total cell lysates and extracted core histones. Protein labeling levels were reduced due to the elevated acetylation levels. Jurkat T cells were either labeled with 10 mM alkynyl-acetate analog alone for 8 h, or co-incubated with 10 mM alkynyl-acetate analog as well as 10  $\mu$ M SAHA for 8 h. The cell lysates and core histones were reacted with az-Rho, precipitated in MeOH at -80 °C overnight and analyzed by in-gel fluorescence scanning. SAHA was chemically synthesized by following the reported synthetic procedures<sup>13</sup>. The Western blot stained with anti-acetyl-Lys antibody showed the elevated acetylation level of histones in the presence of SAHA. (d) Inhibition of p300-dependent cellular labeling by 60  $\mu$ M curcumin<sup>14,15</sup>. (Top) Protein labeling levels on core histones were reduced. (Bottom) Profiling total cell lysates showed many proteins have reduced labeling intensities. However, due to the cell toxicity of curcumin, non-specific protein labeling was also observed for sodium 3-butynoate (4). HeLa cells were either labeled with 10 mM alkynyl-acetate analogs alone for 4 h or pre-treated with 60  $\mu$ M curcumin for 30 min then labeled with alkynyl-acetate analogs for additional 4 h. After metabolic labeling, HeLa cells were gently rinsed with ice-cold PBS before harvesting to remove those non-adherent cells. The cell lysates were reacted with az-Rho, precipitated in MeOH at -80 °C overnight and analyzed by in-gel fluorescence scanning. Although 100  $\mu$ M curcumin can inhibit p300-mediated cellular labeling on histones more effectively than 60  $\mu$ M curcumin<sup>14,15</sup>, we observed significant toxicity to HeLa cells with this concentration.



**C**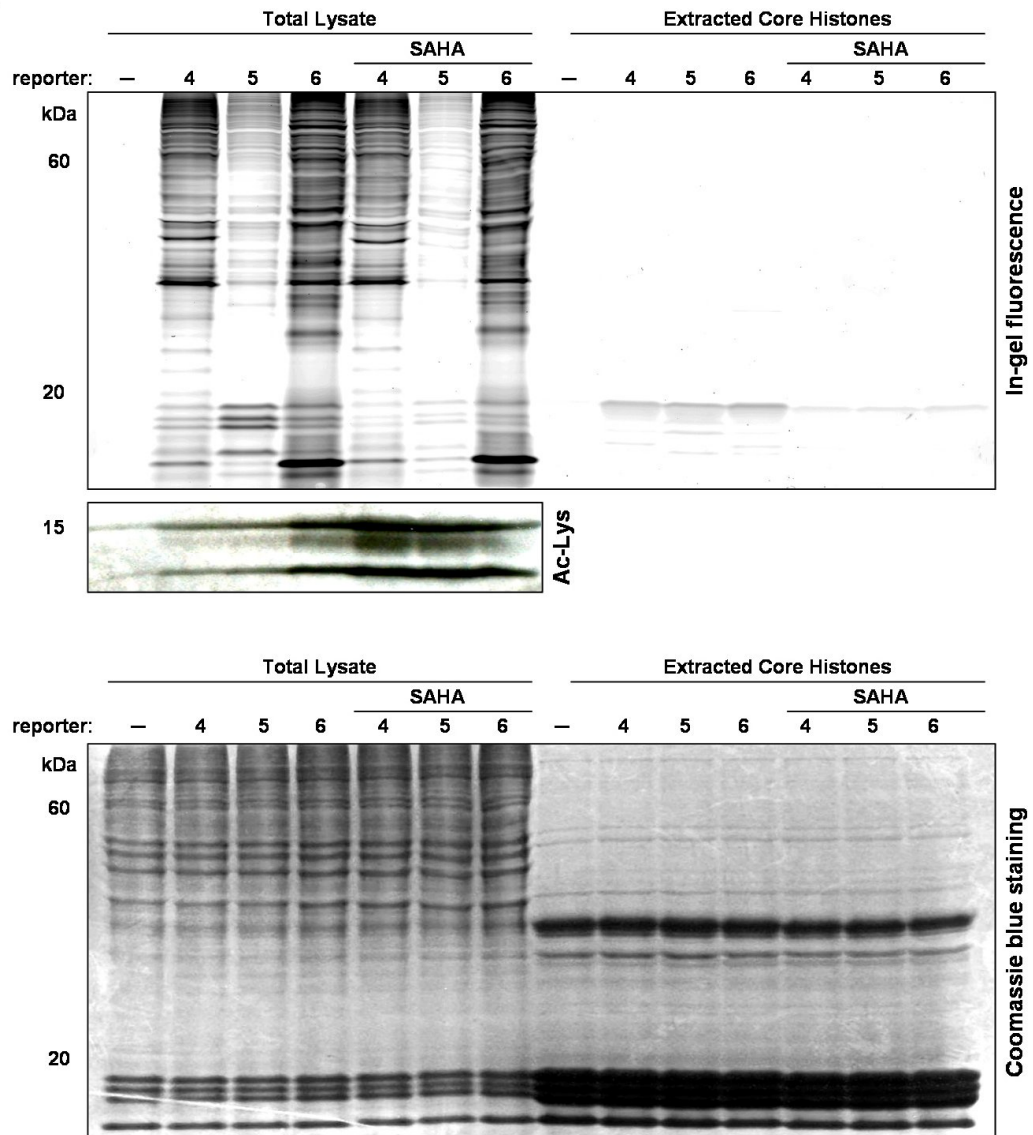

**d**

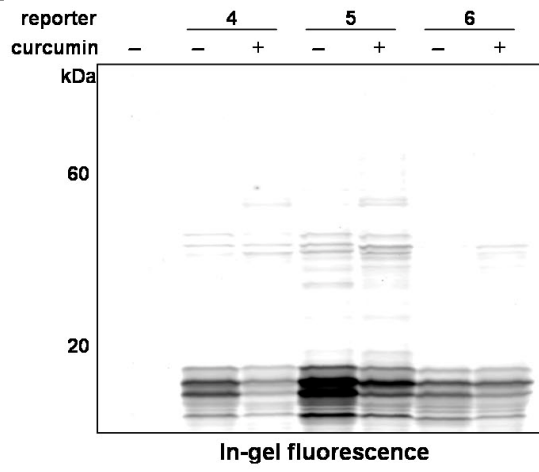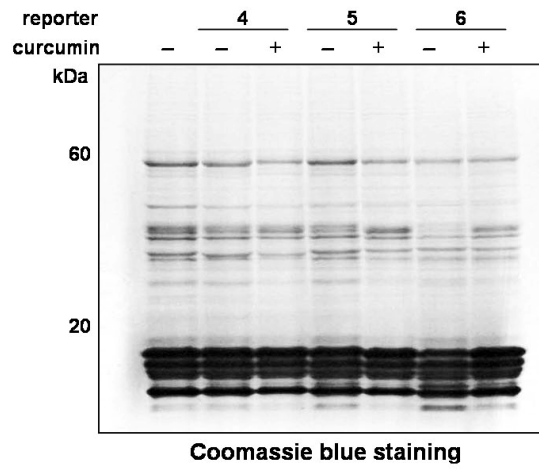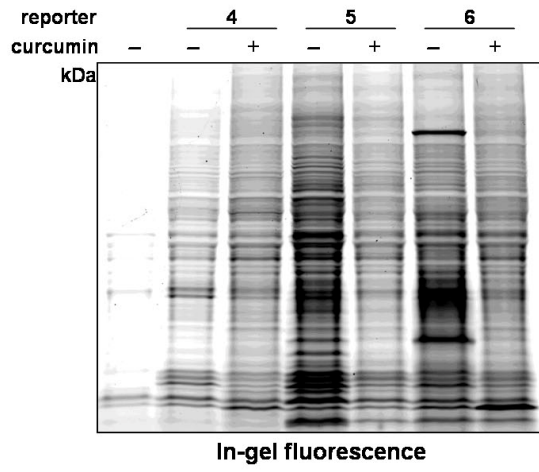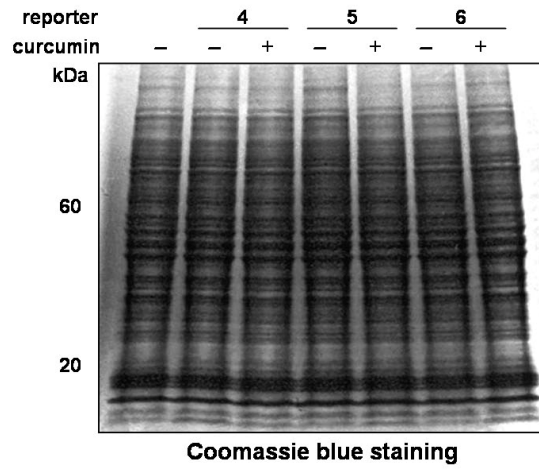

**Figure S6. In-gel fluorescence detection of acetylated proteins in different mammalian cell lines using alkynyl-acetate analogs.** ~50  $\mu\text{g}$  of total cell lysates were reacted with az-Rho via CuAAC. All the different cell lines were labeled with 5 mM alkynyl-acetate analogs for 6 h.

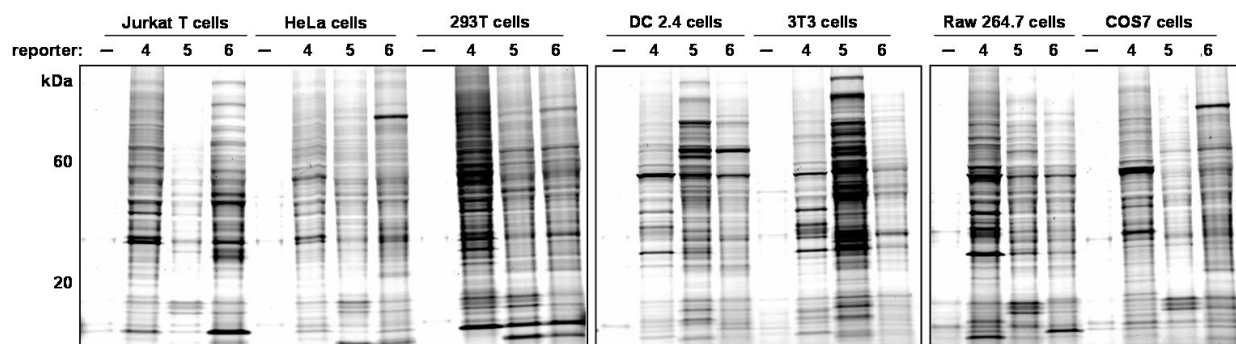

**In-gel fluorescence**

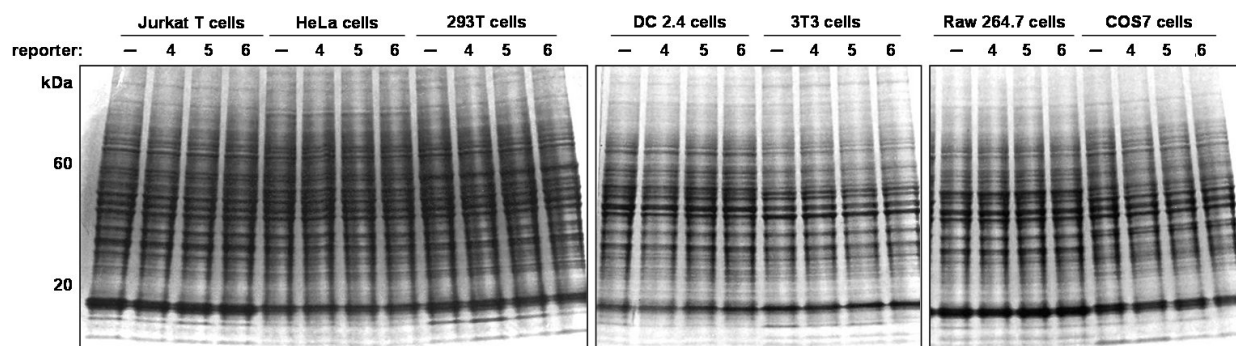

**Coomassie blue staining**

**Figure S7. Proteomic analysis of sodium 3-butynoate (4)-, sodium 4-pentynoate (5)- and sodium 5-hexynoate (6)-metabolically labeled proteins in Jurkat T cells.** (a) Schematic of proteomic profiling of metabolically labeled proteins by employing the cleavable azido-diazo-biotin tag. (b) Profiles of enriched labeled proteins from two independent experiments. The in-gel fluorescence images (top and bottom panels) showed the metabolically-labeled protein profiles of Jurkat T cells, in which ~50  $\mu\text{g}$  of total cell lysate were reacted with az-Rho via CuAAC. The coomassie blue-stained gels (top and bottom panels) showed the profiles of the eluted labeled proteins, in which the total cell lysates (12-20 mg) were reacted with azido-diazo-biotin via CuAAC followed by streptavidin-enrichment and  $\text{Na}_2\text{S}_2\text{O}_4$ -elution. (c) Confirming MS/MS-identified protein hits by Western blot analysis. Along with the input, an aliquot of the enriched protein eluent from control (dd  $\text{H}_2\text{O}$ ) as well as from **4**, **5** and **6**-labeled cell lysates was loaded onto the gel, separated on SDS-PAGE and then transferred onto PVDF membrane. The proteins of interest were probed with their corresponding antibodies. (d) The Venn diagram shows the counts of unique and overlapped proteins labeled by different alkynyl-acetate analogs.

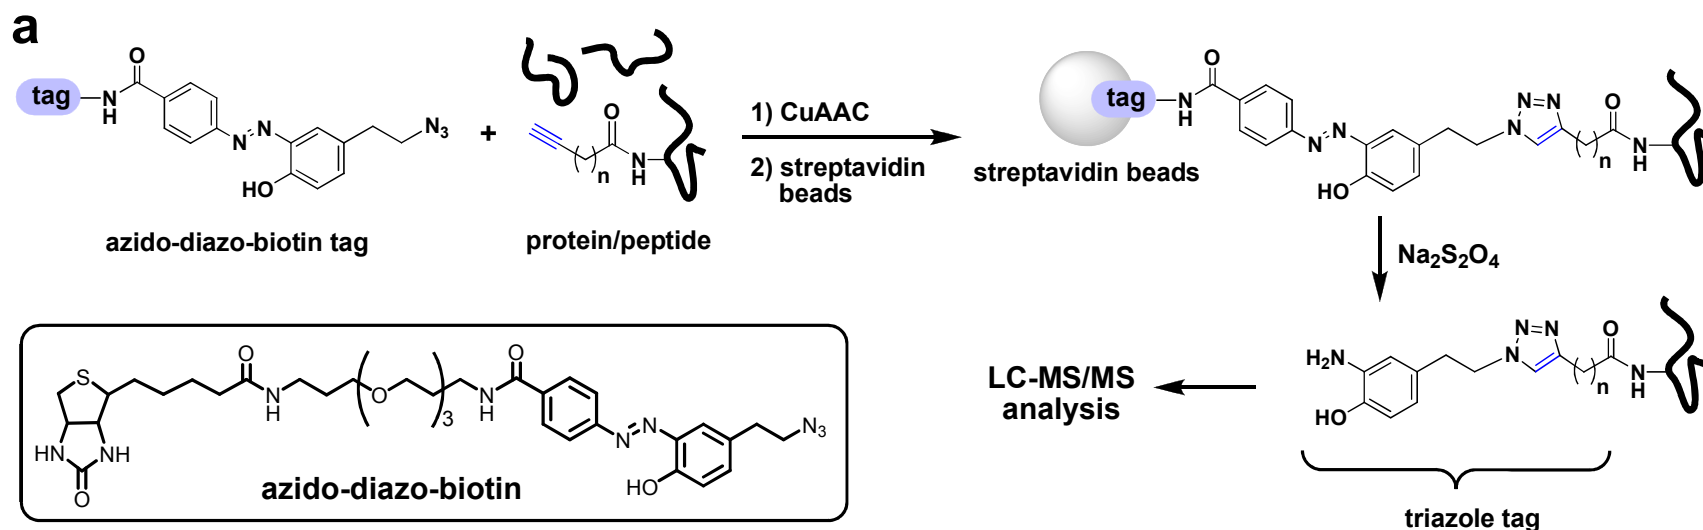

**b**

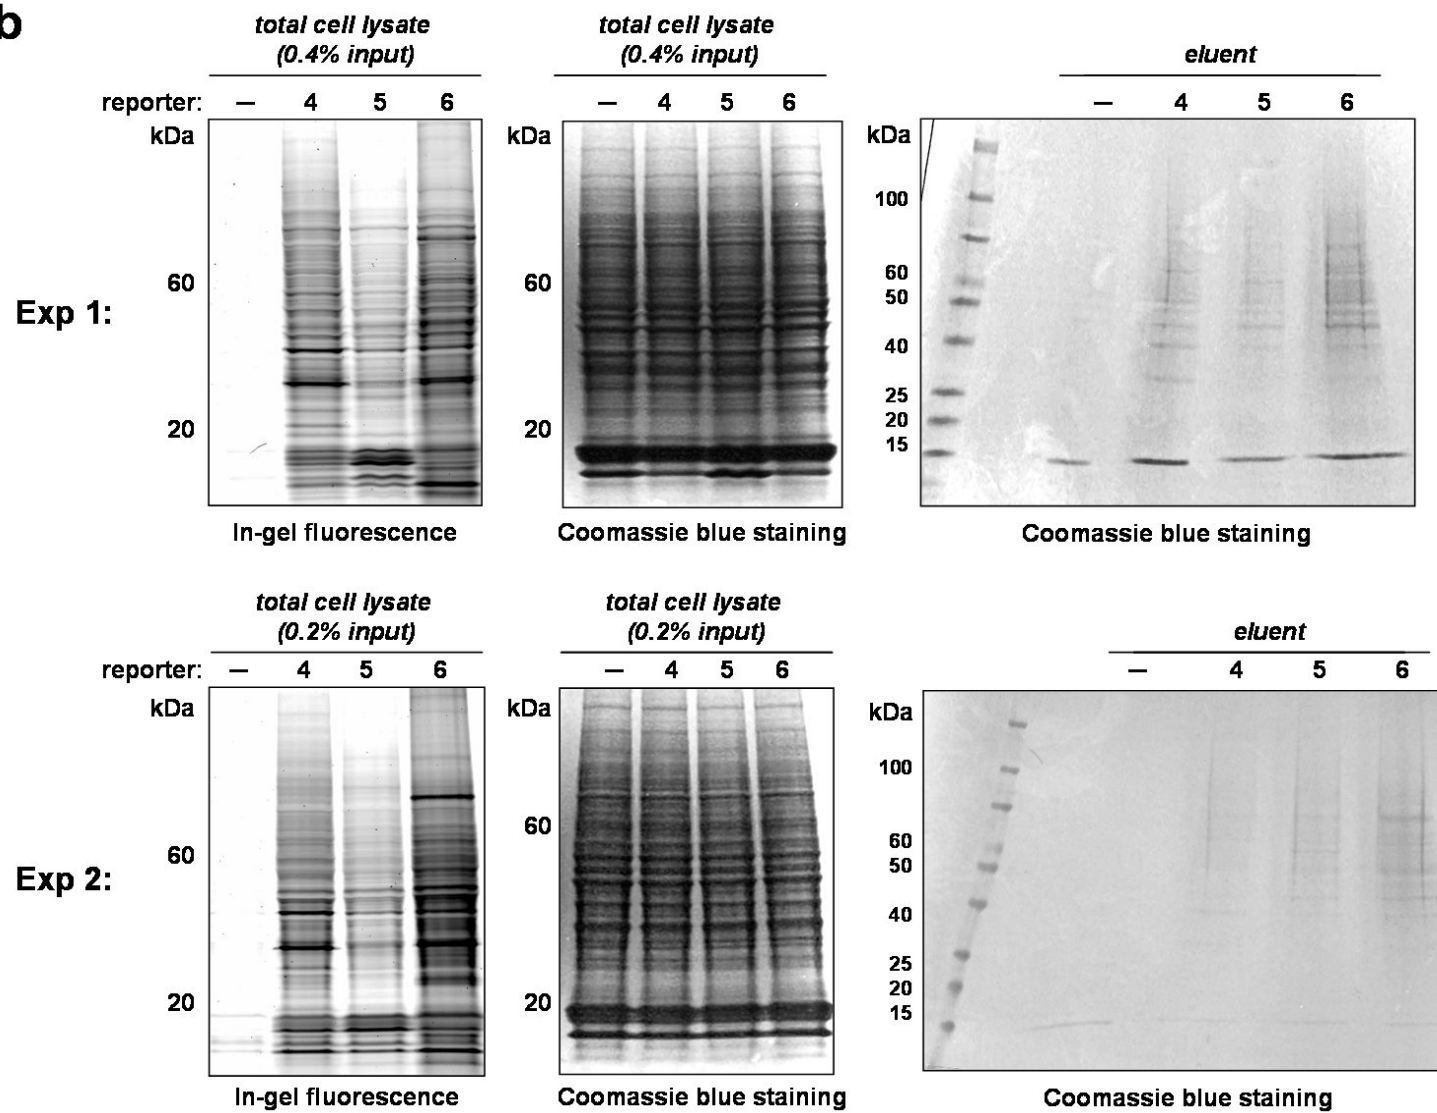



**C**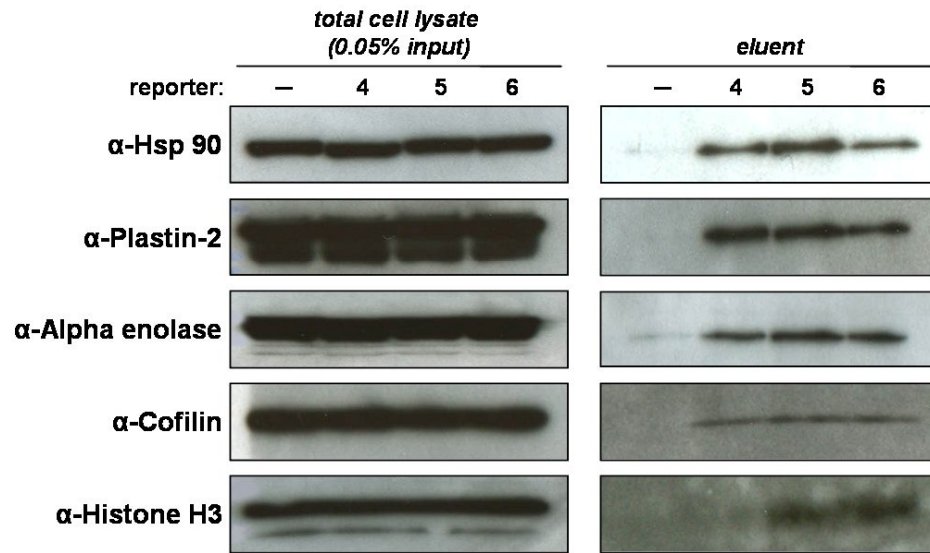**d**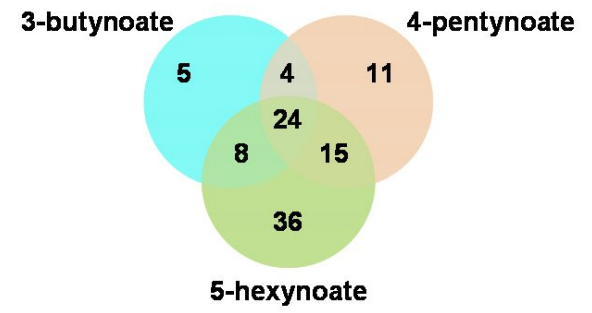

**Table S2. Spectral count data of 3-butynoate (4)-, 4-pentynoate (5)- and 5-hexynoate (6)-metabolically labeled proteins derived from two independent proteomics experiments (Jurkat T cells).** Raw tandem mass spectra were searched against the human IPI protein database version 3.56 using SEQUEST search engine (Thermo Scientific). Cysteine carbamidomethylation was searched as fixed modification, while methionine/tryptophan oxidation, asparagines/glutamine deamidation, lysine acetylation and lysine 3-butynylation/4-pentynylation/5-hexynylation were searched as variable modifications. Each peptide spectrum must meet several selection thresholds including >95% for peptide identification probability, >1.0 for SEQUEST XCorr score, and  $\pm 6$  ppm for actual minus calculated peptide mass. Each protein listed has spectral count greater than or equal to 2, and the ratio of alkynyl-acetate analogs/control is greater than 3. The spectral counts from experiment #1 are colored in black, while the spectral counts from experiment #2 are colored in blue. The listing order of proteins is based on the molecular weight. This table also highlights those proteins that have been previously identified as lysine-acetylated proteins by Zhao and co-workers<sup>16</sup>, Mann and co-workers<sup>17</sup> and Hake and co-workers<sup>18</sup>. Notably, the proteomic data reported by both Zhao *et al.* and Hake *et al.* were acquired from HeLa cells, while the proteomic data reported by Mann *et al.* were acquired from Jurkat T cells, A549 cells, MV4-11 cells. Note: dd H<sub>2</sub>O was added to the cells as the negative control. The data of the negative control was not included in this table.

| No | Protein Name           | Accession number                                                                                                                | Total spectral counts of peptides |              |             | Known acetylated proteins |      |      |
|----|------------------------|---------------------------------------------------------------------------------------------------------------------------------|-----------------------------------|--------------|-------------|---------------------------|------|------|
|    |                        |                                                                                                                                 | 3-butynoate                       | 4-pentynoate | 5-hexynoate | Zhao                      | Mann | Hake |
| 1  | Histone H4             | IPI00453473                                                                                                                     | 31                                | 45, 3        | 24, 5       | √                         | √    | √    |
| 2  | Histone H2A type 1-B/E | IPI00026272, IPI00031562, IPI00081836, IPI00216456, IPI00220855, IPI00255316, IPI00291764, IPI00552873, IPI00902514             |                                   | 59           | 26          | √                         | √    | √    |
| 3  | Histone H2A type 2-C   | IPI00339274                                                                                                                     |                                   | 2            | 26          | √                         | √    | √    |
| 4  | Histone H2B type 2-E   | IPI00003935, IPI00152785, IPI00220403, IPI00515061                                                                              | 3                                 | 6            | 5           | √                         |      | √    |
| 5  | Histone H2B type 1-L   | IPI00018534, IPI00020101, IPI00152906, IPI00303133, IPI00329665, IPI00419833, IPI00554798, IPI00646240, PI00794461, IPI00815755 | 26                                | 2            | 15          | √                         | √    | √    |
| 6  | Histone H3.1           | IPI00465070                                                                                                                     | 2                                 | 4            | 3           | √                         | √    | √    |

|    |                                                                               |                                                    |        |       |       |   |   |   |
|----|-------------------------------------------------------------------------------|----------------------------------------------------|--------|-------|-------|---|---|---|
| 7  | Histone H3.2                                                                  | IPI00171611, IPI00219038, IPI00465070, IPI00909530 | 10     | 5     | 8     | √ |   | √ |
| 8  | Histone H2A.x                                                                 | IPI00219037                                        |        | 11    |       | √ | √ | √ |
| 9  | Profilin-1                                                                    | IPI00216691                                        |        | 3     | 3, 5  | √ | √ | √ |
| 10 | Calcium-regulated heat stable protein 1                                       | IPI00304409                                        | 4      |       |       |   |   |   |
| 11 | Peptidyl-prolyl cis-trans isomerase A                                         | IPI00419585                                        | 2      | 3     | 5, 4  |   | √ | √ |
| 12 | ubiquitin and ribosomal protein s27a precursor                                | IPI00179330, IPI00456429, IPI00719280              | 3      | 2     |       |   | √ |   |
| 13 | Histone H2B type1-N                                                           | IPI00794461                                        | 20     | 32    | 9     | √ |   | √ |
| 14 | Cofilin-1                                                                     | IPI00012011                                        | 2      |       | 2, 3  | √ | √ | √ |
| 15 | Isoform 2 of DnaJ homolog subfamily C member 5                                | IPI00158847                                        |        |       | 22    |   | √ |   |
| 16 | Protein DJ-1                                                                  | IPI00298547                                        | 24, 2  |       |       |   | √ |   |
| 17 | Peroxiredoxin-1                                                               | IPI00000874                                        |        | 2     | 2     |   | √ |   |
| 18 | Glutathione S-transferase P                                                   | IPI00019755                                        |        | 3     |       |   | √ |   |
| 19 | Isoform SNAP-23a of synaptosomal-associated protein 23                        | IPI00010438                                        |        |       | 4     |   |   |   |
| 20 | Rho GDP-dissociation inhibitor 2                                              | IPI00003817                                        | 4      | 6     | 5, 3  |   | √ |   |
| 21 | GTP-binding nuclear protein Ran                                               | IPI00643041, IPI00795671                           |        | 2     |       |   | √ |   |
| 22 | GrpE protein homolog 1, mitochondrial                                         | IPI00029557                                        |        |       | 2     |   | √ |   |
| 23 | High mobility group protein 1-like 10                                         | IPI00018755, IPI00419258                           | 2      | 15, 2 | 4     |   | √ |   |
| 24 | Highly mobility group protein B1                                              | IPI00419258                                        | 16     | 19    | 9     | √ | √ | √ |
| 25 | Isoform 1 of deoxyuridine 5'-triphosphate nucleotidohydrolase, mitochondrial  | IPI00013679, IPI00375015, IPI00749113              |        |       | 3     |   | √ |   |
| 26 | 14-3-3 protein zeta/delta                                                     | IPI00021263                                        |        | 6, 2  | 12, 6 |   | √ |   |
| 27 | Glutathione S-transferase omega-1                                             | IPI00019755                                        | 139, 8 |       | 25, 8 |   | √ |   |
| 28 | Isoform Long of ES1 protein homolog, mitochondrial                            | IPI00024913, IPI00218482                           |        |       | 2     |   | √ |   |
| 29 | Thioredoxin-dependent peroxide reductase, mitochondrial                       | IPI00024919, IPI00374151                           |        |       | 2     |   | √ |   |
| 30 | 28 kDa protein (Isoform B1 of heterogeneous nuclear ribonucleoproteins A2/B1) | IPI00396378, IPI00414696, IPI00874030              | 10     | 8     | 14    |   | √ |   |

|    |                                                                                    |                                                                                           |         |     |       |   |   |   |
|----|------------------------------------------------------------------------------------|-------------------------------------------------------------------------------------------|---------|-----|-------|---|---|---|
| 31 | 14-3-3 protein epsilon                                                             | IPI00000816                                                                               |         |     | 2     |   | √ |   |
| 32 | 29 kDa protein                                                                     | IPI00453476, IPI00549725                                                                  |         | 3   |       |   | √ |   |
| 33 | Transcription factor A, mitochondrial                                              | IPI00020928                                                                               |         | 2   |       |   |   |   |
| 34 | Isoform 2 of tropomyosin alpha-3 chain                                             | IPI00218319, IPI00218320, IPI00382894, IPI00479185, IPI00477649, IPI00854592, IPI00909961 |         | 2   | 3     |   | √ |   |
| 35 | Isoform 1 of triosephosphate isomerase                                             | IPI00465028                                                                               |         | 10  | 12    | √ | √ |   |
| 36 | S-formylglutathione hydrolase                                                      | IPI00411706                                                                               | 2       |     |       |   | √ |   |
| 37 | Isoform C1 of heterogeneous nuclear ribonucleoproteins C1/C2                       | IPI00216592, IPI00477313                                                                  |         |     | 3     |   | √ |   |
| 38 | Thioredoxin domain-containing protein 1                                            | IPI00395887                                                                               |         |     | 3     |   |   |   |
| 39 | Isoform 1 of nucleophosmin                                                         | IPI00549248, IPI00658013                                                                  |         | 5   |       | √ | √ | √ |
| 40 | Glyceraldehyde-3-phosphate dehydrogenase                                           | IPI00219018                                                                               | 207, 12 | 71  | 238   |   | √ | √ |
| 41 | L-lactate dehydrogenase B chain                                                    | IPI00219217                                                                               | 4       |     | 33, 6 |   | √ |   |
| 42 | Poly(rC)-binding protein 1                                                         | IPI00016610                                                                               |         | 2   |       |   | √ |   |
| 43 | Bifunctional methylenetetrahydrofolate dehydrogenase/cyclohydrolase, mitochondrial | IPI00396378, IPI00414696, IPI00874030                                                     |         |     | 3, 5  |   | √ |   |
| 44 | Delta-aminolevulinic acid dehydratase                                              | IPI00442121, IPI00790373                                                                  |         |     | 2     |   |   |   |
| 45 | Isoform A1-B of heterogeneous nuclear ribonucleoprotein A1                         | IPI00215965                                                                               |         | 3   | 3     |   | √ | √ |
| 46 | Fructose-bisphosphate aldolase A                                                   | IPI00465439                                                                               |         | 2   | 2     |   | √ |   |
| 47 | 39 kDa protein                                                                     | IPI00916260                                                                               |         | 2   |       |   |   |   |
| 48 | cDNA FLJ55792, highly similar to L-lactate dehydrogenase A chain                   | IPI00217966, IPI00607708, IPI00908791                                                     |         |     | 11, 3 |   | √ |   |
| 49 | Isoform 1 of isocitrate dehydrogenase [NAD] subunit alpha, mitochondrial           | IPI00030702, IPI00792971, IPI00909577, IPI00921820                                        |         |     | 2     |   | √ |   |
| 50 | Adenosine deaminase                                                                | IPI00296441, IPI00872639                                                                  | 2, 2    |     | 3     |   | √ |   |
| 51 | Actin, cytoplasmic 1                                                               | IPI00021439, IPI00021440, IPI00894498                                                     | 148     | 126 | 218   |   | √ | √ |

|    |                                                                              |                                                                              |       |      |       |   |   |   |
|----|------------------------------------------------------------------------------|------------------------------------------------------------------------------|-------|------|-------|---|---|---|
| 52 | Galphai2 protein                                                             | IPI00465121, IPI00748145                                                     |       |      | 8     |   |   |   |
| 53 | Flap endonuclease 1                                                          | IPI00026215                                                                  |       | 2    |       |   | √ |   |
| 54 | Guanine nucleotide binding protein (G protein), q polypeptide, isoform CRA_c | IPI00288947                                                                  |       |      | 3     |   | √ |   |
| 55 | cDNA FLJ53975, highly similar to acetyl-CoA acetyltransferase, cytosolic     | IPI00291419                                                                  |       |      | 3     |   | √ |   |
| 56 | Phosphoglycerate kinase 1                                                    | IPI00169383                                                                  | 9     | 12   | 39    |   | √ |   |
| 57 | Transcription Termination Factor, mitochondrial                              | IPI00016095                                                                  |       |      | 101   |   |   |   |
| 58 | Isoform alpha-enolase of Alpha-enolase                                       | IPI00465248                                                                  | 17    | 8    | 31    | √ | √ |   |
| 59 | Heterogenous nuclear ribonucleoprotein H                                     | IPI00013881                                                                  | 3     |      | 5     |   | √ |   |
| 60 | Elongation factor 1-alpha 2                                                  | IPI00014424                                                                  |       |      | 2     | √ | √ | √ |
| 61 | Tubulin beta chain                                                           | IPI00011654                                                                  | 34    | 42   | 94    |   | √ |   |
| 62 | Tubulin alpha-1C chain                                                       | IPI00218343                                                                  | 64    | 46   | 103   |   | √ |   |
| 63 | Coronin-1A                                                                   | IPI00010133                                                                  | 13, 4 | 7    | 12    |   | √ |   |
| 64 | Isoform 1 of Heterogeneous nuclear ribonucleoprotein K                       | IPI00216049, IPI00216746, IPI00807545                                        | 2     | 2    |       |   |   |   |
| 65 | Trifunctional enzyme subunit beta, mitochondrial                             | IPI00022793                                                                  |       |      | 50, 9 |   | √ |   |
| 66 | Isocitrate dehydrogenase [NADP], mitochondrial                               | IPI00011107                                                                  |       | 7    | 36, 8 |   | √ |   |
| 67 | cDNA FLJ54554, highly similar to pyruvate kinase isozymes M1/M2              | IPI00910979                                                                  | 2     |      | 19    |   | √ |   |
| 68 | Protein RCC2                                                                 | IPI00465044                                                                  | 2     | 2    |       |   | √ |   |
| 69 | Serine hydroxymethyltransferase, mitochondrial                               | IPI00002520, IPI00748411, IPI00794549, IPI00794572, IPI00908824, IPI00909681 |       |      | 2     |   | √ |   |
| 70 | 59 kDa protein                                                               | IPI00302925, IPI00784090                                                     |       |      | 2     |   | √ |   |
| 71 | Isoform 3 of proto-oncogene tyrosine protein kinase LCK                      | IPI00515097                                                                  |       |      | 19, 9 |   | √ |   |
| 72 | 60 kDa heat shock protein, mitochondrial                                     | IPI00784154                                                                  | 3     | 3, 3 | 22, 8 |   | √ |   |

|    |                                                                                  |                                       |       |       |        |  |   |   |
|----|----------------------------------------------------------------------------------|---------------------------------------|-------|-------|--------|--|---|---|
| 73 | Glucose-6-phosphate-isomerase                                                    | IPI00027497, IPI00908881, IPI00910781 |       |       | 2      |  | √ |   |
| 74 | heterogeneous nuclear ribonucleoprotein L                                        | IPI00027834                           |       |       | 4      |  | √ |   |
| 75 | Isoform 1 of Acyl-CoA synthetase family member 3, mitochondrial                  | IPI00166395, IPI00645533              |       |       | 4, 4   |  | √ |   |
| 76 | NAD-dependent malic enzyme, mitochondrial                                        | IPI00011201                           |       |       | 4      |  | √ |   |
| 77 | Lamin-B1                                                                         | IPI00217975, IPI00790831              |       |       | 2      |  | √ |   |
| 78 | Acyl-CoA synthetase family member 2, mitochondrial                               | IPI00304071                           |       | 47, 6 | 3      |  | √ |   |
| 79 | Acyl-CoA dehydrogenase family member 9, mitochondrial                            | IPI00152981, IPI00790834              |       |       | 6      |  | √ |   |
| 80 | cDNA FLJ54957, highly similar to transketolase                                   | IPI00643920, IPI00792641, IPI00793119 |       |       | 2      |  | √ | √ |
| 81 | Plastin-2                                                                        | IPI00010471                           | 22, 5 | 3     | 4, 6   |  | √ |   |
| 82 | ATP-dependent DNA helicase 2 subunit 1                                           | IPI00644712                           | 2     | 2     | 2, 4   |  | √ | √ |
| 83 | cDNA FLJ51819, weakly similar ot long-chain fatty acid-CoA ligase, mitochondrial | IPI00304071, IPI00909579              |       | 45    |        |  | √ |   |
| 84 | cDNA FLJ55574, highly similar to Calnexin                                        | IPI00020984                           |       |       | 24, 11 |  | √ |   |
| 85 | Nucleolin                                                                        | IPI00604620                           | 2     | 8     |        |  | √ |   |
| 86 | ATP-dependent DNA helicase 2 subunit 2                                           | IPI00220834, IPI00871391              | 2     | 2     | 4      |  | √ |   |
| 87 | Heat shock protein HSP 90-beta                                                   | IPI00414676                           | 6, 3  | 2, 3  | 16, 6  |  | √ | √ |
| 88 | Transferrin receptor protein 1                                                   | IPI00022462                           |       | 2     | 12     |  |   |   |
| 89 | Isoform long of delta-1-pyrroline-5-carboxylate synthetase                       | IPI00008982, IPI00218547              |       |       | 3      |  |   |   |
| 90 | Endoplasmic                                                                      | IPI00027230                           |       |       | 2      |  |   |   |
| 91 | Heat shock 70kDa protein 4                                                       | IPI00002966                           | 2     |       | 2      |  | √ |   |
| 92 | Elongation factor 2                                                              | IPI00186290                           |       |       | 7      |  | √ |   |
| 93 | cDNA FLJ55599, highly similar to DNA replication licensing factor MCM3           | IPI00013214                           | 2     |       |        |  | √ |   |
| 94 | Poly [ADP-ribose] polymerase 1                                                   | IPI00449049                           | 2     | 3     | 2      |  | √ |   |

|     |                                                          |                                                    |           |           |           |  |   |  |
|-----|----------------------------------------------------------|----------------------------------------------------|-----------|-----------|-----------|--|---|--|
| 95  | Ubiquitin-like modifier-activating enzyme 1              | IPI00645078                                        |           | 2         | 2         |  | √ |  |
| 96  | Leucine-rich PPR motif-containing protein, mitochondrial | IPI00783271                                        |           |           | 4         |  | √ |  |
| 97  | DNA topoisomerase 2 (Fragment)                           | IPI00178667, IPI00218753, IPI00414101, IPI00879004 | 2         |           |           |  | √ |  |
| 98  | Isoform 1 of clathrin heavy chain 1                      | IPI00024067, IPI00455383                           |           |           | 2         |  | √ |  |
| 99  | Isoform 2 of Nebulin-related anchoring protein           | IPI00398162, IPI00478974, IPI00745227, IPI00786896 |           | 15        |           |  |   |  |
| 100 | Isoform 1 of myosin-9                                    | IPI00019502                                        | 10        |           | 9         |  | √ |  |
| 101 | Fatty acid synthetase                                    | IPI00026781                                        |           | 2         | 14        |  | √ |  |
| 102 | Cation-independent mannose-6-phosphate receptor          | IPI00289819, IPI00903213                           |           |           | 2         |  | √ |  |
| 103 | Isoform 2 of filamin-A                                   | IPI00302592, IPI00333541, IPI00644576, IPI00909642 |           | 3         | 6         |  | √ |  |
|     | <b>Total protein numbers</b>                             |                                                    | <b>41</b> | <b>54</b> | <b>83</b> |  |   |  |

% of 3-butynoate-labeled known acetylated proteins/total 3-butynoate-labeled proteins (39/41) = 95.1%

% of 4-pentynoate-labeled known acetylated proteins/total 4-pentynoate-labeled proteins (48/54) = 88.9%

% of 5-hexynoate-labeled known acetylated proteins/total 5-hexynoate-labeled proteins (75/83) = 90.4%





**Table S3. Spectral count data of 4-pentynoate (5)-metabolically labeled proteins (Jurkat T cells).** As the stock solution of sodium 4-pentynoate was prepared in sterile dd H<sub>2</sub>O, we added the same volume of dd H<sub>2</sub>O into cells as a negative control. Raw tandem mass spectra were searched against the human IPI protein database version 3.56 using SEQUEST search engine (Thermo Scientific). Cysteine carbamidomethylation was searched as fixed modification, while methionine/tryptophan oxidation, asparagines/glutamine deamidation, lysine acetylation and lysine 4-pentynylation were searched as variable modifications. Each peptide spectrum must meet several selection thresholds including >95% for peptide identification probability, >1.0 for SEQUEST XCorr score, and  $\pm 6$  ppm for actual minus calculated peptide mass. Each protein listed here has spectral count greater than or equal to 2, and the ratio of 4-pentynoate/control is greater than 3. The listing order of proteins is based on the molecular weight. This table also highlights those proteins that have been previously identified as lysine-acetylated proteins by Zhao and co-workers<sup>16</sup>, Mann and co-workers<sup>17</sup> and Hake and co-workers<sup>18</sup>. Notably, the proteomic data reported by both Zhao *et al.* and Hake *et al.* were acquired from HeLa cells, while the proteomic data reported by Mann *et al.* were acquired from Jurkat T cells, A549 cells, MV4-11 cells.

| No | Protein Name                                                    | Accession Number                                                                                                                 | Total spectral counts of peptides |              |      |      |      |
|----|-----------------------------------------------------------------|----------------------------------------------------------------------------------------------------------------------------------|-----------------------------------|--------------|------|------|------|
|    |                                                                 |                                                                                                                                  | Neg                               | 4-pentynoate | Zhao | Mann | Hake |
| 1  | Histone H4                                                      | IPI00453473                                                                                                                      | 18                                | 297          | √    | √    | √    |
| 2  | Histone H2A type 1-H                                            | IPI00081836, IPI00216457, IPI00220855, IPI00255316, IPI00291764, IPI00339274, IPI00552873                                        | 33                                | 187          | √    | √    | √    |
| 3  | Histone H2A.V                                                   | IPI00018278, IPI00218448                                                                                                         | 0                                 | 14           | √    | √    | √    |
| 4  | Histone H2B type 1-L                                            | IPI00018534, IPI00020101, IPI00152906, IPI00303133, IPI00329665, IPI00419833, IPI00554798, IPI00646240, IPI00794461, IPI00815755 | 0                                 | 184          | √    | √    | √    |
| 5  | Histone H2B type 2-E                                            | IPI00003935, IPI00152785, IPI00220403, IPI00515061                                                                               | 0                                 | 14           | √    | √    | √    |
| 6  | Isoform 2 of PEST proteolytic signal-containing nuclear protein | IPI00060650, IPI00291608, IPI00796456                                                                                            | 0                                 | 5            | √    | √    | √    |
| 7  | Activated RNA polymerase II transcriptional coactivator p15     | IPI00221222                                                                                                                      | 0                                 | 5            |      | √    |      |
| 8  | Histone H3.1                                                    | IPI00465070                                                                                                                      | 0                                 | 22           |      | √    |      |

|           |                                                                               |                                                                 |          |           |   |   |   |
|-----------|-------------------------------------------------------------------------------|-----------------------------------------------------------------|----------|-----------|---|---|---|
| <b>9</b>  | Fatty acid-binding protein, epidermal                                         | IPI00007797                                                     | <b>0</b> | <b>4</b>  |   | √ |   |
| <b>10</b> | Acyl carrier protein, mitochondrial                                           | IPI00022442                                                     | <b>0</b> | <b>5</b>  |   | √ |   |
| <b>11</b> | Stathmin                                                                      | IPI00479997, IPI00921996                                        | <b>0</b> | <b>11</b> |   | √ |   |
| <b>12</b> | ubiquitin and ribosomal protein S27a precursor                                | IPI00179330, IPI00456429, IPI00719280                           | <b>0</b> | <b>26</b> |   | √ |   |
| <b>13</b> | Cofilin-1                                                                     | IPI00012011                                                     | <b>0</b> | <b>9</b>  | √ | √ | √ |
| <b>14</b> | Ras-related C3 botulinum toxin substrate 2                                    | IPI00010270, IPI00877663, IPI00878066                           | <b>0</b> | <b>4</b>  |   | √ |   |
| <b>15</b> | Chromobox protein homolog 3                                                   | IPI00297579                                                     | <b>0</b> | <b>27</b> |   | √ |   |
| <b>16</b> | 39S ribosomal protein L12, mitochondrial                                      | IPI00005537                                                     | <b>0</b> | <b>4</b>  |   |   |   |
| <b>17</b> | Peroxiredoxin-1                                                               | IPI00000874, IPI00640741                                        | <b>0</b> | <b>4</b>  |   | √ |   |
| <b>18</b> | Histone H1.4                                                                  | IPI00217467                                                     | <b>0</b> | <b>30</b> |   | √ |   |
| <b>19</b> | Histone H1x                                                                   | IPI00021924                                                     | <b>0</b> | <b>8</b>  |   | √ |   |
| <b>20</b> | Histone H1.5                                                                  | IPI00217468                                                     | <b>0</b> | <b>31</b> |   | √ |   |
| <b>21</b> | Isoform 1 of Ras-related protein Rab-1A                                       | IPI00005719, IPI00334174, IPI00873902, IPI00917079, IPI00922662 | <b>0</b> | <b>3</b>  |   |   |   |
| <b>22</b> | Glutathione S-transferase P                                                   | IPI00219757                                                     | <b>0</b> | <b>27</b> |   | √ |   |
| <b>23</b> | Rho GDP-dissociated inhibitor                                                 | IPI00003817, IPI00792758                                        | <b>0</b> | <b>12</b> |   | √ |   |
| <b>24</b> | GTP-binding nuclear protein Ran                                               | IPI00643041, IPI00792352, IPI00795671, IPI00796462              | <b>0</b> | <b>8</b>  |   | √ |   |
| <b>25</b> | High mobility group protein B2                                                | IPI00219097                                                     | <b>0</b> | <b>14</b> |   | √ |   |
| <b>26</b> | High mobility group protein B1                                                | IPI00419258                                                     | <b>4</b> | <b>85</b> | √ | √ | √ |
| <b>27</b> | Isoform 1 of Nuclear ubiquitous casein and cyclin-dependent kinases substrate | IPI00022145, IPI00872944                                        | <b>0</b> | <b>12</b> |   |   |   |
| <b>28</b> | Isoform 1 of 3-hydroxyacyl-CoA dehydrogenase type-2                           | IPI00017726                                                     | <b>0</b> | <b>6</b>  |   |   |   |
| <b>29</b> | Isoform 1 of deoxyuridine 5'-triphosphate nucleotidohydrolase, mitochondrial  | IPI00013679, IPI00375015, IPI00749113, IPI00793322              | <b>0</b> | <b>90</b> |   | √ |   |
| <b>30</b> | 14-3-3 protein zeta/delta                                                     | IPI00021263, IPI00879359                                        | <b>0</b> | <b>3</b>  |   | √ |   |

|           |                                                                            |                                                                                           |          |           |   |   |   |
|-----------|----------------------------------------------------------------------------|-------------------------------------------------------------------------------------------|----------|-----------|---|---|---|
| <b>31</b> | Glutathione S-transferase omega-1                                          | IPI00019755                                                                               | <b>0</b> | <b>49</b> |   | √ |   |
| <b>32</b> | Thioredoxin-dependent peroxide reductase, mitochondrial                    | IPI00024919, IPI00374151                                                                  | <b>0</b> | <b>3</b>  |   | √ |   |
| <b>33</b> | Proteasome activator complex subunit 1                                     | IPI00479722                                                                               | <b>0</b> | <b>26</b> |   |   |   |
| <b>34</b> | Isoform 1 of Acidic leucine-rich nuclear phosphoprotein 32 family member B | IPI00007423, IPI00759824                                                                  | <b>0</b> | <b>7</b>  |   | √ |   |
| <b>35</b> | 29 kDa                                                                     | IPI00453476, IPI00549725                                                                  | <b>0</b> | <b>2</b>  |   | √ |   |
| <b>36</b> | Putative uncharacterized protein PSME2                                     | IPI00384051, IPI00746205                                                                  | <b>0</b> | <b>3</b>  |   |   |   |
| <b>37</b> | 14-3-3 protein epsilon                                                     | IPI00000816                                                                               | <b>0</b> | <b>5</b>  |   | √ |   |
| <b>38</b> | Isoform 1 of Triosephosphate isomerase                                     | IPI00465028                                                                               | <b>0</b> | <b>2</b>  | √ | √ |   |
| <b>39</b> | Complement component 1 Q subcomponent-binding protein, mitochondrial       | IPI00014230                                                                               | <b>0</b> | <b>4</b>  |   | √ |   |
| <b>40</b> | Isoform 3 of Voltage-dependent anion-selective channel protein 2           | IPI00216026, IPI00455531, IPI00737171, IPI00917420                                        | <b>0</b> | <b>6</b>  |   | √ |   |
| <b>41</b> | Isoform C1 of Heterogeneous nuclear ribonucleoproteins C1/C2               | IPI00216592, IPI00909232                                                                  | <b>0</b> | <b>10</b> |   | √ |   |
| <b>42</b> | Isoform 1 of Protein SET                                                   | IPI00072377, IPI00301311, IPI00844040, IPI00896523, IPI00917753                           | <b>0</b> | <b>29</b> |   | √ | √ |
| <b>43</b> | Isoform 1 of Nucleophosmin                                                 | IPI00549248                                                                               | <b>2</b> | <b>33</b> | √ | √ | √ |
| <b>44</b> | tropomyosin 3 isoform 1                                                    | IPI00183968, IPI00218319, IPI00218320, IPI00382894, IPI00477649, IPI00479185, IPI00642042 | <b>0</b> | <b>8</b>  | √ | √ | √ |
| <b>45</b> | ADP/ATP translocase 2                                                      | IPI00007188                                                                               | <b>0</b> | <b>5</b>  |   | √ |   |
| <b>46</b> | MACRO domain-containing protein 1                                          | IPI00155601                                                                               | <b>0</b> | <b>2</b>  |   | √ |   |
| <b>47</b> | DNA-(apurinic or apyrimidinic site) lyase                                  | IPI00215911                                                                               | <b>0</b> | <b>4</b>  |   | √ |   |
| <b>48</b> | cDNA FLJ60094, highly similar to F-actin capping protein subunit beta      | IPI00218782, IPI00641107, IPI00642256                                                     | <b>0</b> | <b>4</b>  |   | √ |   |

|           |                                                                       |                                                                              |          |           |  |   |   |
|-----------|-----------------------------------------------------------------------|------------------------------------------------------------------------------|----------|-----------|--|---|---|
| <b>49</b> | Isoform B1 of heterogeneous nuclear ribonucleoproteins A2/B1          | IPI00396378, IPI00414696, IPI 00874030, IPI00916517                          | <b>4</b> | <b>18</b> |  | √ |   |
| <b>50</b> | Poly(rC)-binding protein 1                                            | IPI00016610                                                                  | <b>0</b> | <b>6</b>  |  | √ |   |
| <b>51</b> | Isoform 1 of Prostaglandin reductase 2                                | IPI00167515                                                                  | <b>0</b> | <b>33</b> |  |   |   |
| <b>52</b> | Isoform 1 of Heterogeneous nuclear ribonucleoprotein D0               | IPI00028888, IPI00220683, IPI00220684, IPI00220685, IPI00903278, IPI00915340 | <b>0</b> | <b>9</b>  |  | √ |   |
| <b>53</b> | H2A histone family, member Y isoform 2                                | IPI00059366, IPI00304171, IPI00744148                                        | <b>0</b> | <b>13</b> |  |   |   |
| <b>54</b> | Annexin A1                                                            | IPI00218918, IPI00549413                                                     | <b>0</b> | <b>4</b>  |  | √ |   |
| <b>55</b> | Isoform A1-B of Heterogeneous nuclear ribonucleoprotein A1            | IPI00215965, IPI00465365, IPI00797148                                        | <b>3</b> | <b>19</b> |  | √ | √ |
| <b>56</b> | Isoform 1 of Heterogeneous nuclear ribonucleoprotein A3               | IPI00419373, IPI00455134, IPI00909208                                        | <b>0</b> | <b>2</b>  |  | √ |   |
| <b>57</b> | Adenosine deaminase                                                   | IPI00296441, IPI00872639                                                     | <b>0</b> | <b>14</b> |  | √ |   |
| <b>58</b> | Synaptic vesicle membrane protein VAT-1 homolog                       | IPI00156689, IPI00184402, IPI00789469, IPI00797605                           | <b>0</b> | <b>4</b>  |  |   |   |
| <b>59</b> | Galphai2 protein                                                      | IPI00465121, IPI00748145                                                     | <b>0</b> | <b>4</b>  |  |   |   |
| <b>60</b> | Heterogeneous nuclear ribonucleoprotein G                             | IPI00304692, IPI00816796                                                     | <b>0</b> | <b>3</b>  |  | √ |   |
| <b>61</b> | 3-ketoacyl-CoA thiolase, mitochondrial                                | IPI00001539                                                                  | <b>0</b> | <b>22</b> |  | √ |   |
| <b>62</b> | Flap endonuclease 1                                                   | IPI00026215                                                                  | <b>0</b> | <b>7</b>  |  | √ |   |
| <b>63</b> | Protein DEK                                                           | IPI00020021, IPI00871695                                                     | <b>0</b> | <b>7</b>  |  | √ |   |
| <b>64</b> | cDNA FLJ59403, highly similar to Nucleosome assembly protein 1-like-4 | IPI00017763, IPI00789437, IPI00798071                                        | <b>0</b> | <b>3</b>  |  |   |   |
| <b>65</b> | Isoform 1 of Plasminogen activator inhibitor 1 RNA-binding protein    | IPI00410693, IPI00412714, IPI00470497, IPI00470498                           | <b>0</b> | <b>3</b>  |  | √ |   |
| <b>66</b> | Heterogeneous nuclear ribonucleoprotein F                             | IPI00003881                                                                  | <b>0</b> | <b>5</b>  |  | √ |   |
| <b>67</b> | Lupus La protein                                                      | IPI00009032, IPI00916802                                                     | <b>0</b> | <b>19</b> |  | √ |   |
| <b>68</b> | Calreticulin                                                          | IPI00020599                                                                  | <b>4</b> | <b>14</b> |  | √ |   |

|           |                                                                                                                  |                                                    |          |           |  |   |  |
|-----------|------------------------------------------------------------------------------------------------------------------|----------------------------------------------------|----------|-----------|--|---|--|
| <b>69</b> | Isoform 1 of Spliceosome RNA helicase BAT1                                                                       | IPI00848161                                        | <b>0</b> | <b>2</b>  |  | √ |  |
| <b>70</b> | Dihydrolipoyllysine-residue succinyltransferase component of 2-oxoglutarate dehydrogenase complex, mitochondrial | IPI00420108                                        | <b>0</b> | <b>9</b>  |  | √ |  |
| <b>71</b> | Heterogeneous nuclear ribonucleoprotein H                                                                        | IPI00013881, IPI00479191                           | <b>4</b> | <b>24</b> |  | √ |  |
| <b>72</b> | Elongation factor 1-alpha1                                                                                       | IPI00396485, IPI00472724                           | <b>9</b> | <b>41</b> |  | √ |  |
| <b>73</b> | Multifunctional protein ADE2                                                                                     | IPI00217223                                        | <b>0</b> | <b>15</b> |  | √ |  |
| <b>74</b> | Histone acetyltransferase type B catalytic subunit                                                               | IPI00024719, IPI00651621                           | <b>0</b> | <b>3</b>  |  |   |  |
| <b>75</b> | cDNA FLJ53368, highly similar to Pyruvate kinase isozymes M1/M2                                                  | IPI00847989                                        | <b>0</b> | <b>14</b> |  | √ |  |
| <b>76</b> | Tubulin beta-2C chain                                                                                            | IPI00007752                                        | <b>0</b> | <b>8</b>  |  | √ |  |
| <b>77</b> | isoform Beta of Lamina-associated polypeptide 2, isoforms beta/gamma                                             | IPI00030131                                        | <b>0</b> | <b>21</b> |  | √ |  |
| <b>78</b> | Trifunctional enzyme subunit beta, mitochondrial                                                                 | IPI00022793, IPI00893108                           | <b>0</b> | <b>7</b>  |  | √ |  |
| <b>79</b> | Isocitrate dehydrogenase [NADP], mitochondrial                                                                   | IPI00011107                                        | <b>4</b> | <b>34</b> |  | √ |  |
| <b>80</b> | Isoform 1 of Heterogeneous nuclear ribonucleoprotein K                                                           | IPI00216049, IPI00216746, IPI00807545, IPI00910458 | <b>2</b> | <b>51</b> |  |   |  |
| <b>81</b> | Coronin-1A                                                                                                       | IPI00010133                                        | <b>8</b> | <b>46</b> |  | √ |  |
| <b>82</b> | Calcium/calmodulin-dependent protein kinase type IV                                                              | IPI00430411                                        | <b>0</b> | <b>5</b>  |  | √ |  |
| <b>83</b> | 6-phosphogluconate dehydrogenase, decarboxylating                                                                | IPI00219525, IPI00747533                           | <b>0</b> | <b>2</b>  |  | √ |  |
| <b>84</b> | Isoform 2 of Protein disulfide-isomerase A6                                                                      | IPI00299571, IPI00644989                           | <b>0</b> | <b>4</b>  |  |   |  |
| <b>85</b> | Dihydrolipoyl dehydrogenase, mitochondrial                                                                       | IPI00015911, IPI00909143                           | <b>0</b> | <b>7</b>  |  | √ |  |
| <b>86</b> | Non-POU domain-containing octamer-binding protein                                                                | IPI00304596                                        | <b>0</b> | <b>20</b> |  | √ |  |

|            |                                                                     |                                                    |           |            |  |   |  |
|------------|---------------------------------------------------------------------|----------------------------------------------------|-----------|------------|--|---|--|
| <b>87</b>  | Histone deacetylase 1                                               | IPI00013774                                        | <b>0</b>  | <b>6</b>   |  | √ |  |
| <b>88</b>  | Serine hydroxymethyltransferase, mitochondrial                      | IPI00002520                                        | <b>0</b>  | <b>11</b>  |  | √ |  |
| <b>89</b>  | Protein RCC2                                                        | IPI00465044                                        | <b>0</b>  | <b>15</b>  |  | √ |  |
| <b>90</b>  | Inosine-5'-monophosphate dehydrogenase 2                            | IPI00291510                                        | <b>0</b>  | <b>14</b>  |  | √ |  |
| <b>91</b>  | cDNA FLJ56389, highly similar to Elongation factor 1-gamma          | IPI00000875, IPI00738381, IPI00747497              | <b>0</b>  | <b>4</b>   |  | √ |  |
| <b>92</b>  | ATP synthase subunit beta, mitochondrial                            | IPI00303476                                        | <b>0</b>  | <b>7</b>   |  | √ |  |
| <b>93</b>  | Isoform 1 of Polypyrimidine tract-binding protein 1                 | IPI00179964, IPI00183626, IPI00334175              | <b>0</b>  | <b>10</b>  |  | √ |  |
| <b>94</b>  | D-3-phosphoglycerate dehydrogenase                                  | IPI00011200, IPI00642548                           | <b>0</b>  | <b>2</b>   |  |   |  |
| <b>95</b>  | T-complex protein 1 subunit beta                                    | IPI00297779                                        | <b>0</b>  | <b>13</b>  |  | √ |  |
| <b>96</b>  | Methylmalonate-semialdehyde dehydrogenase [acylating], mitochondria | IPI00024990                                        | <b>0</b>  | <b>11</b>  |  |   |  |
| <b>97</b>  | Isoform M1 of Pyruvate kinase isozymes M1/M2                        | IPI00220644, IPI00479186                           | <b>18</b> | <b>115</b> |  | √ |  |
| <b>98</b>  | Serine/threonine-protein kinase PAK 2                               | IPI00419979                                        | <b>0</b>  | <b>3</b>   |  | √ |  |
| <b>99</b>  | T-complex protein 1 subunit zeta                                    | IPI00027626                                        | <b>0</b>  | <b>6</b>   |  | √ |  |
| <b>100</b> | T-complex protein 1 subunit delta                                   | IPI00302927, IPI00873222, IPI00893358, IPI00921414 | <b>0</b>  | <b>5</b>   |  | √ |  |
| <b>101</b> | T-complex protein 1 subunit eta                                     | IPI00018465                                        | <b>0</b>  | <b>5</b>   |  | √ |  |
| <b>102</b> | Protein phosphatase 1G                                              | IPI00006167                                        | <b>0</b>  | <b>2</b>   |  | √ |  |
| <b>103</b> | Splicing factor 3A subunit 3                                        | IPI00029764                                        | <b>0</b>  | <b>17</b>  |  | √ |  |
| <b>104</b> | T-complex protein 1 subunit epsilon                                 | IPI00010720, IPI00910316                           | <b>0</b>  | <b>5</b>   |  | √ |  |
| <b>105</b> | ATP synthase subunit alpha, mitochondrial                           | IPI00440493                                        | <b>3</b>  | <b>29</b>  |  | √ |  |
| <b>106</b> | Isoform 1 of PC4 and SFRS1-interacting protein                      | IPI00028122                                        | <b>0</b>  | <b>9</b>   |  |   |  |

|            |                                                                                                          |                                       |           |            |   |   |  |
|------------|----------------------------------------------------------------------------------------------------------|---------------------------------------|-----------|------------|---|---|--|
| <b>107</b> | cDNA FLJ56184, highly similar to Proto-oncogene tyrosine-protein kinase LCK                              | IPI00394952, IPI00515097              | <b>0</b>  | <b>9</b>   |   | √ |  |
| <b>108</b> | T-complex protein subunit alpha                                                                          | IPI00290566                           | <b>0</b>  | <b>16</b>  | √ | √ |  |
| <b>109</b> | T-complex protein 1 subunit theta                                                                        | IPI00784090                           | <b>0</b>  | <b>23</b>  |   | √ |  |
| <b>110</b> | 60 kDa heat shock protein, mitochondrial                                                                 | IPI00784154                           | <b>0</b>  | <b>77</b>  |   | √ |  |
| <b>111</b> | Isoform 1 of Heterochromatin protein 1-binding protein 3                                                 | IPI00642238                           | <b>0</b>  | <b>2</b>   |   | √ |  |
| <b>112</b> | Stress-induced-phosphoprotein 1                                                                          | IPI00013894, IPI00871856              | <b>0</b>  | <b>6</b>   |   | √ |  |
| <b>113</b> | Glucose-6-phosphate isomerase                                                                            | IPI00027497, IPI00908881, IPI00910781 | <b>0</b>  | <b>16</b>  |   | √ |  |
| <b>114</b> | Isoform 1 of Acyl-CoA syntetase family member 3, mitochondrial                                           | IPI00166395, IPI00645533              | <b>0</b>  | <b>15</b>  |   | √ |  |
| <b>115</b> | Heterogeneous nuclear ribonucleoprotein L                                                                | IPI00027834                           | <b>0</b>  | <b>9</b>   |   | √ |  |
| <b>116</b> | Isoform 2 of ATPase family AAA domain-containing protein 3A                                              | IPI00295992, IPI00646144              | <b>0</b>  | <b>2</b>   |   | √ |  |
| <b>117</b> | Lamin-B1                                                                                                 | IPI00217975                           | <b>0</b>  | <b>7</b>   |   | √ |  |
| <b>118</b> | Isoform 1 of Poly(A) RNA polymerase, mitochondrial                                                       | IPI00153051, IPI00470416              | <b>0</b>  | <b>3</b>   |   | √ |  |
| <b>119</b> | Moesin                                                                                                   | IPI00219365, IPI00872814              | <b>0</b>  | <b>6</b>   | √ | √ |  |
| <b>120</b> | Acyl-CoA synthetase family member 2, mitochondrial                                                       | IPI00304071, IPI00909579              | <b>0</b>  | <b>221</b> |   | √ |  |
| <b>121</b> | Dihydrolipoyllysine-residue acetyltransferase component of pyruvate dehydrogenase complex, mitochondrial | IPI00021338                           | <b>0</b>  | <b>16</b>  |   | √ |  |
| <b>122</b> | Acyl-CoA dehydrogenase family member 9, mitochondrial                                                    | IPI00152981, IPI00790834              | <b>0</b>  | <b>3</b>   |   | √ |  |
| <b>123</b> | Probable ATP-dependent RNA helicase DDX5                                                                 | IPI00017617                           | <b>0</b>  | <b>3</b>   |   | √ |  |
| <b>124</b> | Plastin-2                                                                                                | IPI00010471                           | <b>22</b> | <b>181</b> |   | √ |  |

|            |                                                                                   |                                                                              |          |            |  |   |   |
|------------|-----------------------------------------------------------------------------------|------------------------------------------------------------------------------|----------|------------|--|---|---|
| <b>125</b> | ATP-dependent DNA helicase 2 subunit 1                                            | IPI00644712                                                                  | <b>3</b> | <b>15</b>  |  | √ | √ |
| <b>126</b> | Isoform 1 of heat shock cognate 71 kDa protein                                    | IPI00003865                                                                  | <b>4</b> | <b>21</b>  |  | √ |   |
| <b>127</b> | cDNA FLJ55574, highly similar to Calnexin                                         | IPI00020984                                                                  | <b>0</b> | <b>4</b>   |  | √ |   |
| <b>128</b> | HSPA5 protein                                                                     | IPI00003362                                                                  | <b>0</b> | <b>10</b>  |  | √ |   |
| <b>129</b> | Dolichyl-diphosphooligosaccharide-protein glycosyltransferase subunit 1 precursor | IPI00025874                                                                  | <b>0</b> | <b>5</b>   |  | √ |   |
| <b>130</b> | Stress-70 protein, mitochondrial                                                  | IPI00007765                                                                  | <b>0</b> | <b>36</b>  |  | √ |   |
| <b>131</b> | annexin VI isoform 2                                                              | IPI00002459, IPI00221226                                                     | <b>0</b> | <b>8</b>   |  | √ |   |
| <b>132</b> | Isoform Beta of Nucleolar phosphoprotein p130                                     | IPI00216654, IPI00292387, IPI00908873                                        | <b>0</b> | <b>11</b>  |  | √ |   |
| <b>133</b> | Isoform 5 of Interleukin enhancer-binding factor 3                                | IPI00219330, IPI00298788, IPI00298789, IPI00414335, IPI00418313, IPI00556173 | <b>0</b> | <b>2</b>   |  | √ |   |
| <b>134</b> | Nucleolin                                                                         | IPI00604620                                                                  | <b>0</b> | <b>307</b> |  | √ |   |
| <b>135</b> | Isoform 1 of Heterogeneous nuclear ribonucleoprotein M                            | IPI00171903, IPI00383296                                                     | <b>0</b> | <b>6</b>   |  | √ |   |
| <b>136</b> | DEAD box polypeptide 17 isoform 1                                                 | IPI00023785, IPI00651653                                                     | <b>0</b> | <b>23</b>  |  | √ |   |
| <b>137</b> | FACT complex subunit SSRP1                                                        | IPI00005154                                                                  | <b>0</b> | <b>5</b>   |  | √ |   |
| <b>138</b> | cDNA FLJ61295, highly similar to Gamma-interferon-inducible protein Ii-16         | IPI00909417                                                                  | <b>0</b> | <b>12</b>  |  |   |   |
| <b>139</b> | ATP-dependent DNA helicase 2 subunit 2                                            | IPI00220834, IPI00871391                                                     | <b>0</b> | <b>7</b>   |  | √ |   |
| <b>140</b> | Trifunctional enzyme subunit alpha, mitochondrial                                 | IPI00031522                                                                  | <b>0</b> | <b>4</b>   |  | √ |   |
| <b>141</b> | Isoform Long of Delta-1-pyrroline-5-carboxylate synthetase                        | IPI00008982, IPI00218547                                                     | <b>0</b> | <b>2</b>   |  |   |   |
| <b>142</b> | Isoform 1 of Nucleolar RNA helicase 2                                             | IPI00015953                                                                  | <b>0</b> | <b>2</b>   |  | √ |   |
| <b>143</b> | Isoform 1 of Transcription intermediary factor 1-beta                             | IPI00438229, IPI00438230                                                     | <b>0</b> | <b>4</b>   |  | √ |   |



|            |                                                                         |                                                    |          |           |  |   |   |
|------------|-------------------------------------------------------------------------|----------------------------------------------------|----------|-----------|--|---|---|
| <b>144</b> | Transitional endoplasmic reticulum ATPase                               | IPI00022774                                        | <b>0</b> | <b>2</b>  |  |   |   |
| <b>145</b> | Isoform Short of Heterogeneous nuclear ribonucleoprotein U              | IPI00479217, IPI00644079, IPI00644224, IPI00883857 | <b>3</b> | <b>14</b> |  | √ |   |
| <b>146</b> | Heat shock protein 90 kDa alpha (cytosolic), class A member 1 isoform 1 | IPI00382470, IPI00784295                           | <b>7</b> | <b>27</b> |  | √ | √ |
| <b>147</b> | DNA topoisomerase 1                                                     | IPI00413611, IPI00902597                           | <b>0</b> | <b>9</b>  |  | √ |   |
| <b>148</b> | Putative pre-mRNA-splicing factor ATP-dependent RNA helicase DHX15      | IPI00396435                                        | <b>0</b> | <b>4</b>  |  | √ |   |
| <b>149</b> | Endoplasmin                                                             | IPI00027230                                        | <b>0</b> | <b>5</b>  |  |   |   |
| <b>150</b> | Heat shock 70 kDa protein 4                                             | IPI00002966                                        | <b>0</b> | <b>5</b>  |  | √ |   |
| <b>151</b> | Elongation factor 2                                                     | IPI00186290                                        | <b>0</b> | <b>22</b> |  | √ |   |
| <b>152</b> | Matrin-3                                                                | IPI00017297, IPI00789551                           | <b>0</b> | <b>11</b> |  | √ |   |
| <b>153</b> | cDNA FLJ55599, highly similar to DNA replication licensing factor MCM3  | IPI00013214                                        | <b>0</b> | <b>3</b>  |  | √ |   |
| <b>154</b> | Importin subunit beta-1                                                 | IPI00001639                                        | <b>0</b> | <b>7</b>  |  | √ |   |
| <b>155</b> | splicing factor 3B subunit 2                                            | IPI00221106, IPI00477803                           | <b>0</b> | <b>3</b>  |  | √ |   |
| <b>156</b> | Retinoblastoma-associated protein                                       | IPI00302829                                        | <b>0</b> | <b>5</b>  |  | √ | √ |
| <b>157</b> | Poly [ADP-ribose] polymerase 1                                          | IPI00449049                                        | <b>0</b> | <b>11</b> |  | √ |   |
| <b>158</b> | Isoform 1 of Presequence protease, mitochondrial                        | IPI00219613, IPI00787827, IPI00908889              | <b>0</b> | <b>5</b>  |  |   |   |
| <b>159</b> | Ubiquitin-like modifier-activating enzyme 1                             | IPI00645078                                        | <b>0</b> | <b>23</b> |  | √ |   |
| <b>160</b> | FACT complex subunit SPT16                                              | IPI00026970                                        | <b>0</b> | <b>9</b>  |  | √ |   |
| <b>161</b> | importin 5                                                              | IPI00793443                                        | <b>0</b> | <b>3</b>  |  |   |   |
| <b>162</b> | ATP-dependent RNA helicase A                                            | IPI00844578                                        | <b>0</b> | <b>8</b>  |  | √ |   |
| <b>163</b> | Splicing factor 3B subunit 1                                            | IPI00026089                                        | <b>0</b> | <b>3</b>  |  | √ |   |
| <b>164</b> | Leucine-rich PPR motif-containing protein, mitochondrial                | IPI00783271                                        | <b>0</b> | <b>2</b>  |  | √ |   |
| <b>165</b> | Isoform 3 of DNA topoisomerase 2-alpha                                  | IPI00218753, IPI00414101, IPI00478232, IPI00879004 | <b>0</b> | <b>14</b> |  | √ |   |
| <b>166</b> | Isoform 1 of Myosin-9                                                   | IPI00019502                                        | <b>0</b> | <b>18</b> |  | √ |   |

|            |                     |             |          |           |  |   |  |
|------------|---------------------|-------------|----------|-----------|--|---|--|
| <b>167</b> | Fatty acid synthase | IPI00026781 | <b>0</b> | <b>61</b> |  | √ |  |
|------------|---------------------|-------------|----------|-----------|--|---|--|

% of 4-pentynoate-labeled known acetylated proteins/total 4-pentynoate-labeled proteins (145/167) = 86.8%

**Figure S9. Mapping the modification sites of 4-pentynoate (5)-labeled proteins in Jurkat T cells.** (a) MS/MS-identified 4-pentynoate modification sites on histones. (b)-(d) Selected MS/MS spectra of sodium 4-pentynoate-modified histone peptides.

**a**

| Histone     | Peptide Sequence                                  |
|-------------|---------------------------------------------------|
| Histone H2B | KGSK(Ac)K*AVTK<br>K(Ac)GSK(Ac)K*AVTK<br>KAVTK*AQK |
| Histone H3  | K*STGGK(Ac)APR<br>KQLATK*AAR                      |
| Histone H4  | GGK*GLGK(Ac)GGAK(Ac)R<br>GGK(Ac)GLGK*GGAK(Ac)R    |

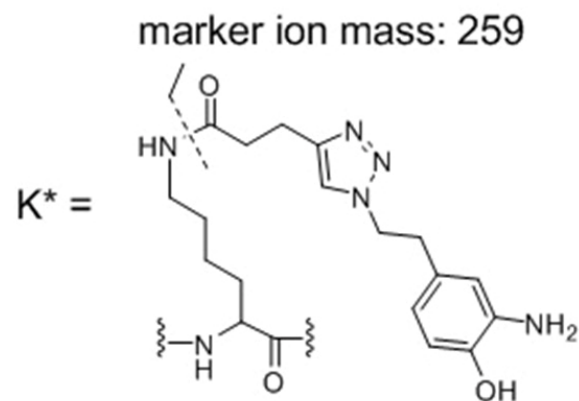

**b**

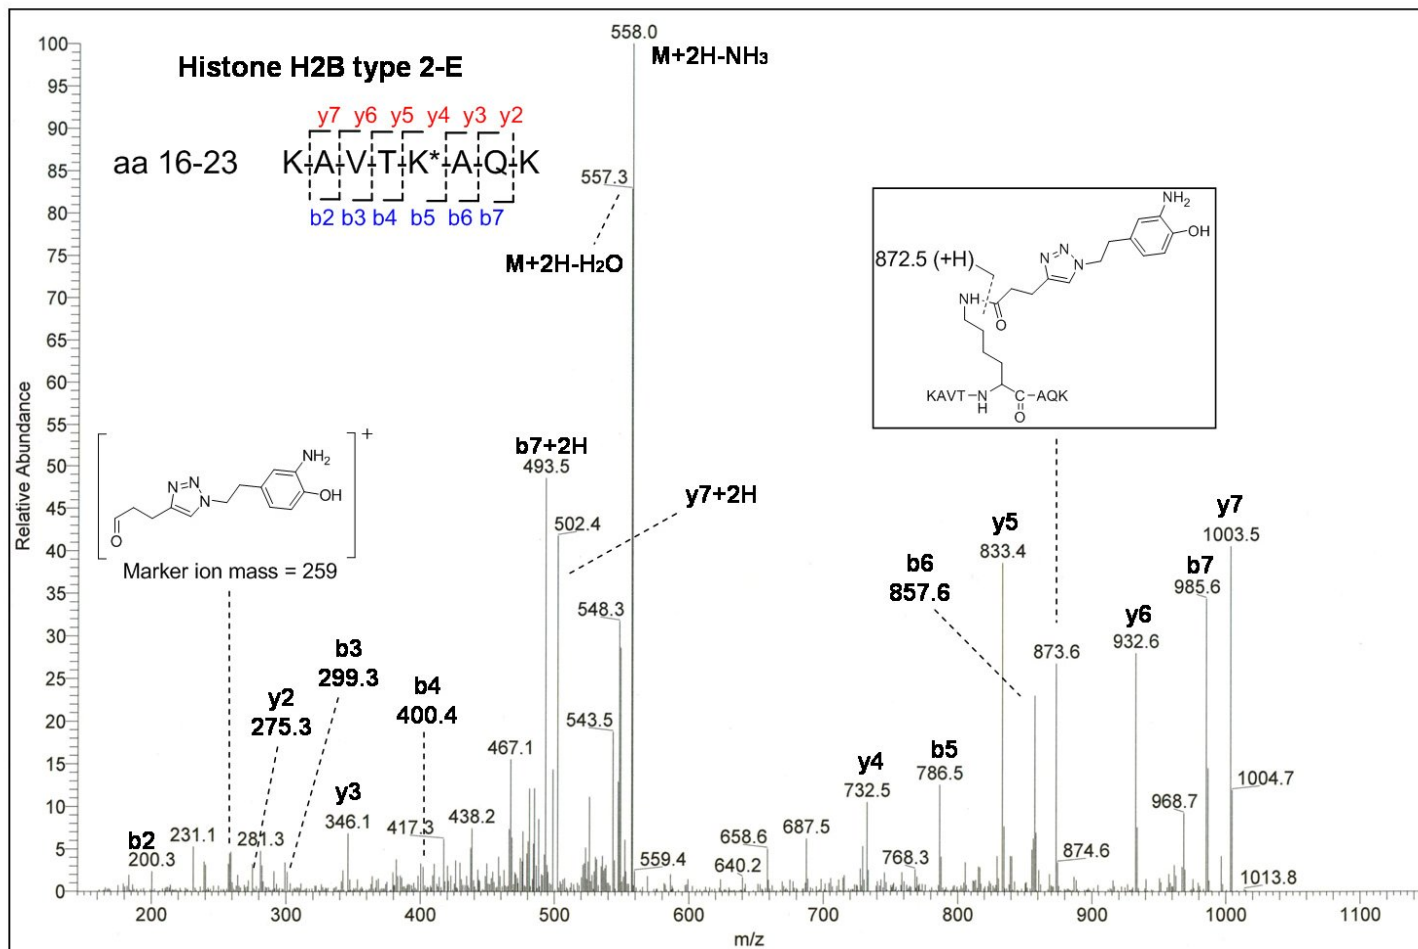

**C**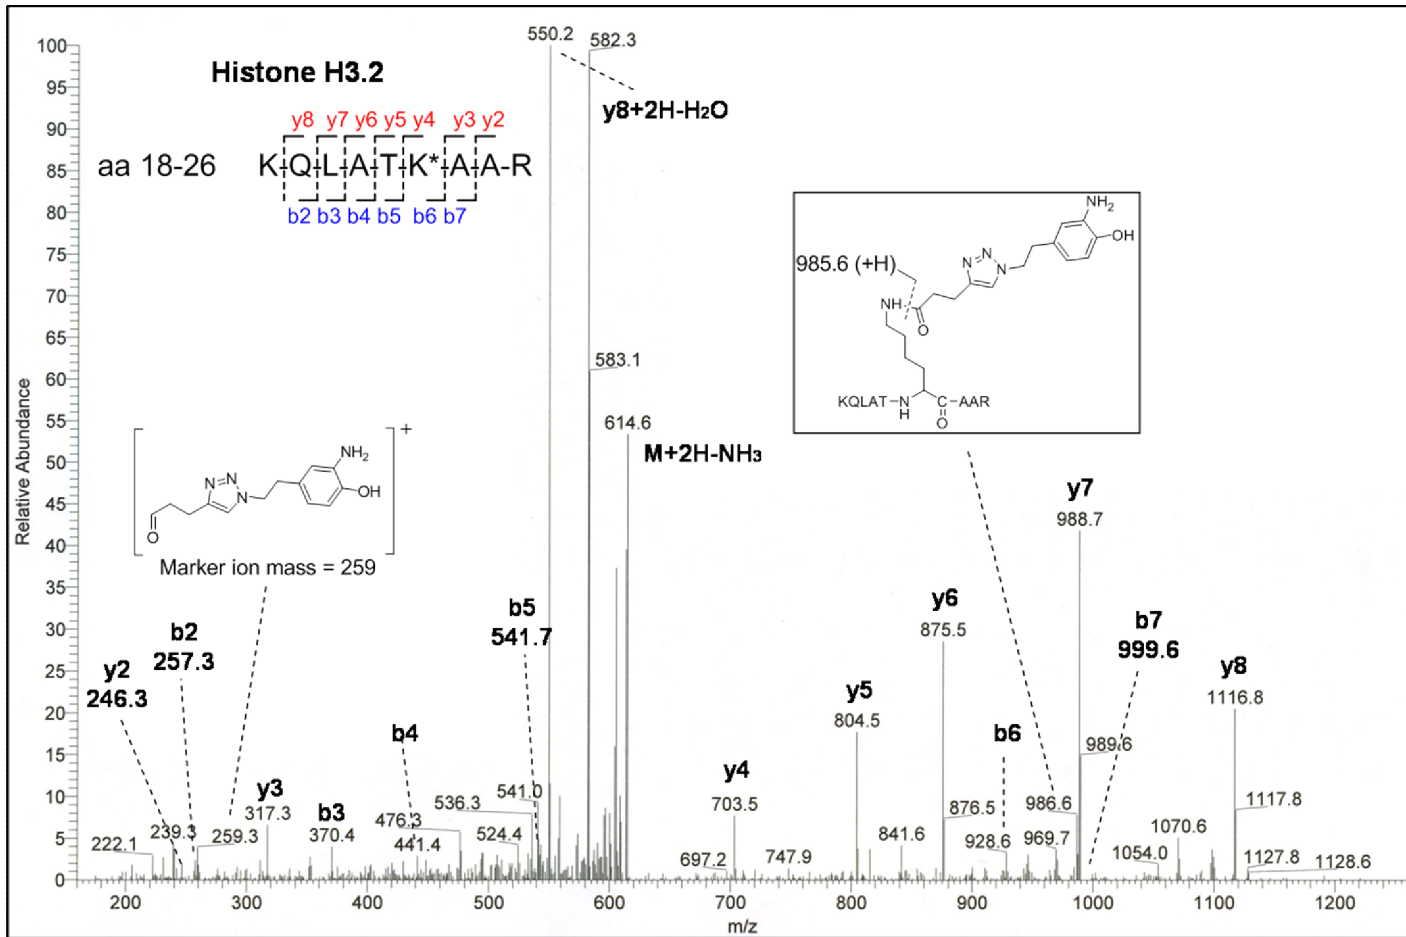

d

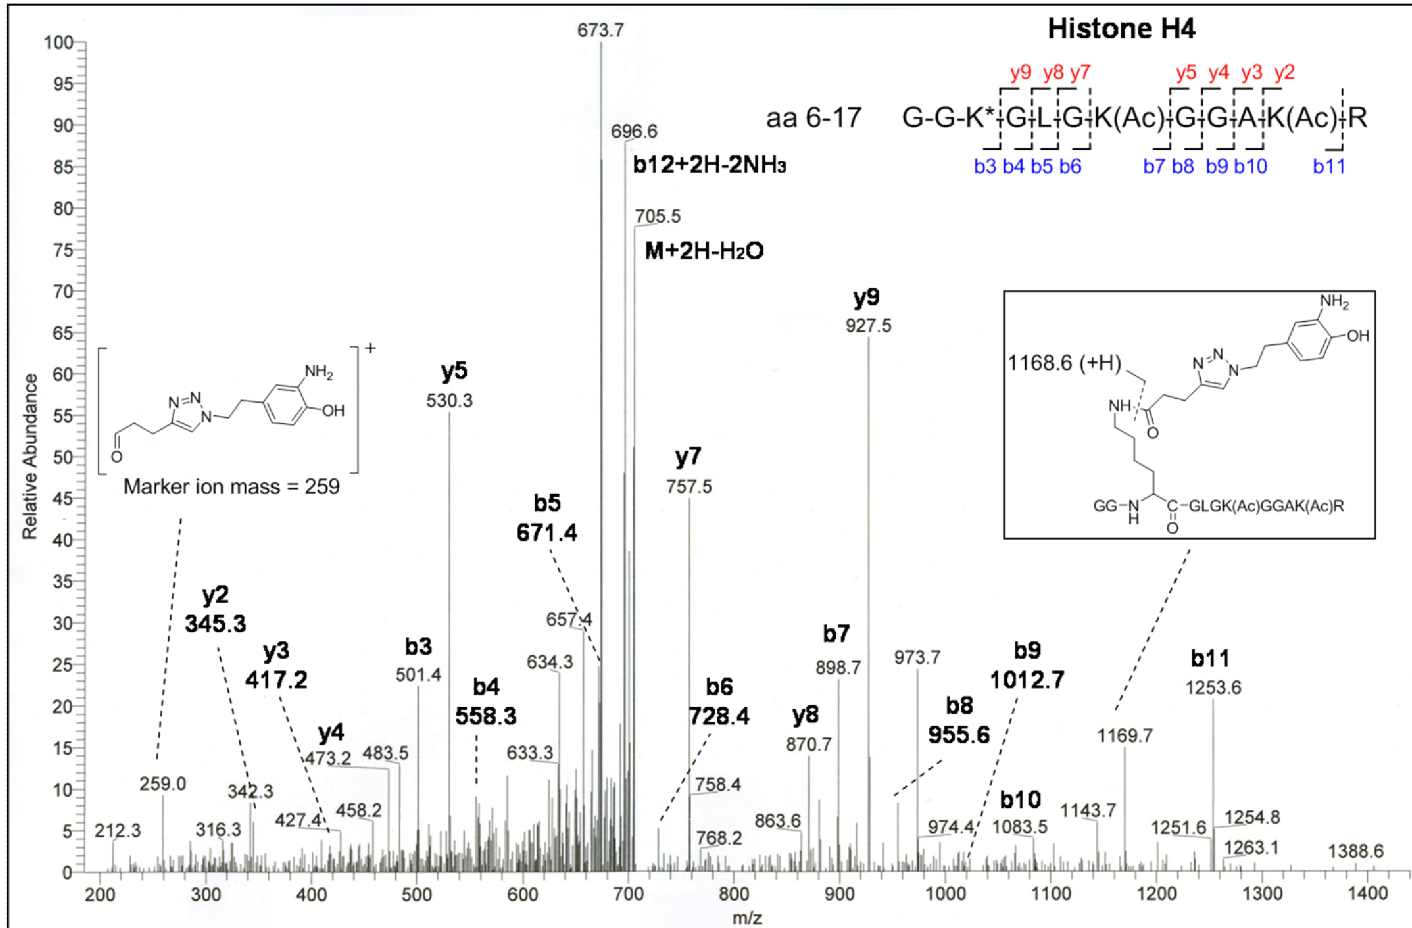

### Supplementary References

1. Wipf, P. and Coish, P. D. G. *J. Org. Chem.* **1999**, *64*, 5053-5061.
2. An, W. and Roeder, R. G. *J. Biol. Chem.* **2003**, *278*, 1504-1510.
3. Gu, W. and Roeder, R. G. *Cell* **1997**, *90*, 595-606.
4. Hwang, Y.; Thompson, P. R.; Wang, L.; Jiang, L.; Kelleher, N. L. and Cole, P. A. *Angew. Chem. Int. Ed.*, **2007**, *46*, 7621-7624.
5. Charron, G.; Zhang, M. M.; Yount J. S.; Wilson, J.; Raghavan, A. S.; Shamir, E. and Hang, H. C. *J. Am. Chem. Soc.* **2009**, *131*, 4967-4975.
6. Chan, T. R.; Hilgraf, R.; Sharpless, K. B. and Fokin V. V. *Org. Lett.* **2004**, *17*, 2853-2855.
7. Shechter, D.; Dormann, H. L.; Allis, C. D. and Hake, S. B. *Nat. Protoc.* **2007**, *2*, 1445-1457.
8. Verhelst, S. H., Fonovic, M. and Bogoyo, M. *Angew Chem Int Ed Engl* **2007**, *46*, 1284-1286.
9. Landi, F.; Johansson, C. M.; Campopiano, D. J. and Hulme, A. N. *Org. Biomol. Chem.* **2010**, *8*, 56-59.
10. Battersby, A. R.; Chrystal, E. J. T.; Staunton, J.. *J. Chem. Soc., Perkin Trans. 1*, **1980**, *1*, 31-42.
11. Huang, Z.; Park, J. I.; Watson, D. S; Hwang, P. and Szoka, F. C., Jr. *Bioconjugate Chem.* **2006**, *17*, 1592-1600.
12. Dieterich, D. C.; Link, A. J.; Graumann, J. Tirrell, D. A. and Schuman, E. M. *Proc. Natl. Acad Sci USA* **2006**, *103*, 9482-9487.
13. Gediya, L. K.; Chopra, P.; Purushottamachar, P.; Maheshwari, N. and Njar, V. C. *J. Med. Chem.* **2005**, *48*, 5047-5051.
14. Balasubramanyam, K.; Varier, R. A.; Altaf, M.; Swaminathan, V.; Siddappa, N. B.; Ranga, U. and Kundu, T. K. *J. Biol. Chem.* **2004**, *279*, 51163-51171.
15. Das, C.; Lucia, M. S.; Hansen, K. C. and Tyler, J. K. *Nature*, **2009**, *459*, 113-117.
16. Kim, S. C.; Sprung, R.; Chen, Y.; Xu, Y.; Ball, H.; Pei, J.; Cheng, T.; Kho, Y.; Xiao, H.; Xiao, L.; Grishin, N. V.; White, M.; Yang, X. J. and Zhao, Y. *Mol. Cell* **2006**, *23*, 607-618.
17. Choudhary, C.; Kumar, C.; Gnad, F.; Nielsen, M. L.; Rehman, M.; Walther, T. C.; Olsen, J. V. and Mann, M. *Science*, **2009**, *325*, 834-840.
18. Basu, A.; Rose, K. L.; Zhang, J.; Beavis, R. C.; Ueberheide B.; Garcia B. A.; Chait, B.; Zhao, Y.; Hunt, D. F.; Segal, E.; Allis, C. D. and Hake, S. B. *Proc. Natl. Acad. Sci. USA* **2009**, *106*, 13785-13790.
